# Supplementary material for: A multisystem, cardio-renal investigation of post-COVID-19 illness
Source: PubMed Central journal article supplement (PMC9205780; doi:10.1038/s41591-022-01837-9), 2022-05-23
Supplement: 41591_2022_1837_MOESM1_ESM.pdf [file 41591_2022_1837_MOESM1_ESM.pdf]

**Supplementary information**

---

**A multisystem, cardio-renal investigation  
of post-COVID-19 illness**

---

In the format provided by the  
authors and unedited

1

## Supplement

2 **Title: Post-COVID-19 illness trajectory: a multisystem investigation.**

3 **Authors: CISCO-19 investigators.**

4 **Reference: NMED-A116731**

5 **The CISCO-19 Investigators**

6 Chief Investigator: Colin Berry BSc/MBChB/PhD

7 **Grant applicants**

8 Kenneth Mangion MD/PhD, Catherine Bagot MBBS/MD, Colin Church MBChB/PhD,  
9 Christian Delles MD, Antonia Ho MBChB/PhD, David J. Lowe MBChB/MD, Alex  
10 McConnachie PhD, Giles Roditi MBChB, Rhian M. Touyz MD/PhD, Naveed Sattar  
11 MBChB/PhD, Ryan Wereski MBChB, Sylvia Wright MBChB, Colin Berry BSc/MBChB/PhD.

12 **Site investigators**

13 *Queen Elizabeth University Hospital*

14 Kenneth Mangion MBChB/PhD, Pauline Hall Barrientos PhD, Kevin G. Blyth MBChB/PhD,  
15 Michael Briscoe MBChB, Colin Church MBChB/PhD, Christian Delles MBChB/PhD, Stephen  
16 Dobbin MBChB, Keith Gillis MBChB/PhD, Antonia Ho MBChB/PhD, Anna Kamdar  
17 BMedSci, David J. Lowe MBChB/MD, Kaitlin J. Mayne MBChB, Patrick B. Mark  
18 MBChB/PhD, Christopher McGinley MBChB, Connor McKee BMedSci/ MBChB, Andrew  
19 Morrow MBChB, Oliver Peck MBChB, Alastair J Rankin BSc/MBChB, Giles Roditi MBChB,  
20 Claire Rooney MBChB/PhD, Sarah A. Spiers PhD, David Stobo MBChB, Ryan Wereski  
21 MBChB, Sylvia Wright MBChB/PhD, Colin Berry BSc/MBChB/PhD.

22 *Royal Alexandra Hospital*

23 Lynn Abel BN, Douglas Grieve MBChB/PhD.

24 *Glasgow Royal Infirmary*

25 Catherine Bagot MBBS/MD, Hannah Bayes MBChB/PhD, Jaelyn Carberry

26 MBChB/BMedSci, Daniel Doherty MBChB, Ian Fergus BSc, Vivienne B. Gibson PhD, Fraser  
27 Goldie MBChB, Laura Knox MBChB, Giles Roditi MBChB, Katherine Scott MBChB, David  
28 Stobo MBChB, Varun Sharma MBChB, Robert Sykes MBChB/BMedSci.

29 **Glasgow Clinical Research Facility and Study Management Group**

30 Ammani Brown BN, Andrew Dougherty BN, Kirsty Fallon BN, Lesley Gilmour BN.

31 Chloe Cowan BN, Lynsey Gillespie PhD, Sharon Kean, Jurgen Van-Melckebeke BSc, Kim  
32 Moran-Jones PhD, Debra Stuart PhD, Maureen Travers PhD.

33 **Glasgow Clinical Research Imaging Facility, Institute of Clinical Excellence, Queen  
34 Elizabeth University Hospital**

35 Tracey Hopkins DCR/BSc(Hons)/PGd, Laura Dymock BSc(Hons), Evonne McLennan  
36 BSc(Hons)/PGc, Rosemary Woodward BSc/PGc, Fiona Savage BSc(Hons)/PGc, Nicola  
37 Tynan BSc(Hons)/PGc.

38 **Radiology, NHS Greater Glasgow and Clyde Health Board**

39 Sau Lee Chang MBChB, Mhairi Dupre MBChB, Lindsey Norton MBChB, Liam Peng  
40 MBChB, Giles Roditi MBChB, David Stobo MBChB.

41 **Laboratory Medicine and Biorepository, NHS Greater Glasgow and Clyde Health Board**

42 Clare Orange BSc, Rory Gunson PhD.

43 **Medical Physics, NHS Greater Glasgow and Clyde**

44 Sarah Allwood-Spiers PhD, George Bruce BSc, Rosario Gonzalez-Lopez PhD, Pauline Hall

45 Barrientos PhD, Rebecca Stace BSc.

46 **University of Glasgow**

47 *Institute of Cardiovascular and Medical Sciences*

48 Colin Berry MBChB/PhD, Elaine Butler BSc, Christian Delles MBChB/PhD, Jennifer S Lees

49 MBChB/PhD, Kenneth Mangion MD/PhD, Patrick Mark MBChB/PhD, Andrew Morrow

50 MBChB, Naveed Sattar MBChB/PhD, Robert Sykes MBChB/BMedSci, Rhian M. Touyz

51 MD/PhD, Paul Welsh PhD.

52 *Institute of Infection, Immunity and Inflammation*

53 *MRC Centre for Virology Research*

54 Antonia Ho MBChB/PhD, Massimo Palmarini PhD.

55 *Institute of Health and Wellbeing*

56 Robertson Centre for Biostatistics

57 John G.F. Cleland MBChB/PhD, Sharon Kean, Bernard Kelly BSc, Alex McConnachie PhD,

58 Alasdair McIntosh PhD, Dionne Russell BSc, Sarah Weeden PhD.

59 *Electrocardiology Core Laboratory*

60 Peter W. Macfarlane DSc, Louise Inglis BSc(Hons), Jean Watt, Kathryn McLaren, Shahid Latif

61 MAppSci (now deceased).

62 *Departments of Mathematics and Statistics*

63 Nick Hill PhD, Dirk Husmeier PhD, Xiaoyu Luo PhD.

64 **National Institutes of Health**

65 Peter Kellman PhD, Hui Xue PhD.

66 **Heartflow**

67 Amy Collinsworth MS, Sarah Mullen MBT, Campbell Rogers MD.

68 **Clinical Event Committee**

69 Heerajnarain Bulluck MBChB/PhD, David Carrick MBChB/PhD, David Corcoran

70 MBChB/PhD, Iain Findlay MBChB/MD, Ninian N. Lang, MBChB/PhD, Vera Lennie

71 MBChB, Ross McGeoch MD, Sabrina Nordin MBChB/MD, Alexander Payne MBChB, Keith

72 E. Robertson MBChB/PhD, Nicola Ryan MBChB, Gruschen Veldtman MBChB/PhD, Robin

73 P. Weir MBChB/PhD, Stuart Watkins MBChB/MD.

74 Coordinators – Andrew Morrow MBChB, Robert Sykes MBChB/BMedSci.

75 **Steering Committee**

76 College of Medical, Veterinary and Life Sciences, University of Glasgow - Neil Basu

77 MD/PhD, Iain McInnes MBChB/PhD, Stefan Siebert MD/PhD.

**Table S1. Expanded - Clinical characteristics of the population by control vs. COVID-19 and likelihood of adjudicated myocarditis post-COVID-19.**

|                                              |                                 | COVID-19                |                      | Control      | p-value <sup>(a)</sup> | p-value <sup>(b)</sup> | Adjudicated Myocarditis Diagnosis |              |              |              | p-value |
|----------------------------------------------|---------------------------------|-------------------------|----------------------|--------------|------------------------|------------------------|-----------------------------------|--------------|--------------|--------------|---------|
|                                              |                                 | Without Primary Outcome | With Primary Outcome |              |                        |                        | Not present                       | Unlikely     | Probable     | Very likely  |         |
|                                              |                                 | n = 104                 | n = 159              | n = 29       |                        |                        | n = 17                            | n = 56       | n = 65       | n = 21       |         |
| <i>Baseline Demographics</i>                 |                                 |                         |                      |              |                        |                        |                                   |              |              |              |         |
| Age, years                                   | Mean (SD)                       | 55.6 (12.3)             | 54.5 (11.9)          | 57.3 (9.6)   | 0.608                  | 0.373                  | 56.9 (11.4)                       | 55.1 (13.3)  | 53.1 (11.4)  | 54.9 (10.1)  | 0.525   |
| Sex                                          | Male                            | 65 (62.5%)              | 90 (56.6%)           | 18 (62.1%)   | 0.371                  | 0.685                  | 13 (76.5%)                        | 35 (62.5%)   | 33 (50.8%)   | 9 (42.9%)    | 0.115   |
|                                              | Female                          | 39 (37.5%)              | 69 (43.4%)           | 11 (37.9%)   |                        |                        | 4 (23.5%)                         | 21 (37.5%)   | 32 (49.2%)   | 12 (57.1%)   |         |
| Race                                         | Arab                            | 0 (0.0%)                | 4 (2.5%)             | 0 (0.0%)     | 0.315                  | 0.788                  | 0 (0.0%)                          | 2 (3.6%)     | 1 (1.5%)     | 1 (4.8%)     | 0.248   |
|                                              | Black                           | 0 (0.0%)                | 2 (1.3%)             | 0 (0.0%)     |                        |                        | 0 (0.0%)                          | 0 (0.0%)     | 2 (3.1%)     | 0 (0.0%)     |         |
|                                              | East Asian                      | 1 (1.0%)                | 4 (2.5%)             | 0 (0.0%)     |                        |                        | 0 (0.0%)                          | 2 (3.6%)     | 2 (3.1%)     | 0 (0.0%)     |         |
|                                              | South Asian                     | 3 (2.9%)                | 8 (5.0%)             | 2 (6.9%)     |                        |                        | 0 (0.0%)                          | 0 (0.0%)     | 6 (9.2%)     | 2 (9.5%)     |         |
|                                              | West Asian                      | 3 (2.9%)                | 2 (1.3%)             | 1 (3.4%)     |                        |                        | 1 (5.9%)                          | 1 (1.8%)     | 0 (0.0%)     | 0 (0.0%)     |         |
|                                              | Latin American                  | 0 (0.0%)                | 0 (0.0%)             | 0 (0.0%)     |                        |                        | 0 (0.0%)                          | 0 (0.0%)     | 0 (0.0%)     | 0 (0.0%)     |         |
|                                              | White                           | 97 (93.3%)              | 139 (87.4%)          | 26 (89.7%)   |                        |                        | 16 (94.1%)                        | 51 (91.1%)   | 54 (83.1%)   | 18 (85.7%)   |         |
| <b>Most deprived SIMD quintile</b>           |                                 | 40 (39.6%)              | 61 (40.4%)           | 5 (17.9%)    | 1.000                  | <b>0.032</b>           | 4 (25.0%)                         | 20 (37.0%)   | 25 (41.0%)   | 12 (60.0%)   | 0.178   |
| Healthcare Worker                            |                                 | 18 (17.3%)              | 36 (22.6%)           | 5 (17.9%)    | 0.350                  | 0.804                  | 1 (5.9%)                          | 10 (17.9%)   | 18 (27.7%)   | 7 (33.3%)    | 0.121   |
| <b>BMI, kg/m<sup>2</sup></b>                 | Mean (SD)                       | 32.0 (6.5)              | 30.5 (7.1)           | 30.7 (5.0)   | <b>0.020</b>           | 0.555                  | 30.9 (5.6)                        | 29.6 (5.8)   | 31.1 (8.7)   | 30.6 (6.4)   | 0.829   |
| <i>Presenting Characteristics</i>            |                                 |                         |                      |              |                        |                        |                                   |              |              |              |         |
| <b>Heart Rate, bpm</b>                       | Mean (SD)                       | 95.4 (19.7)             | 94.8 (19.1)          | 69.0 (15.1)  | 0.652                  | <b>&lt;0.001</b>       | 97.7 (18.8)                       | 94.4 (20.2)  | 94.7 (16.3)  | 93.6 (25.0)  | 0.586   |
| <b>Systolic blood pressure, mmHg</b>         | Mean (SD)                       | 132.7 (18.4)            | 128.5 (19.8)         | 142.1 (18.6) | 0.085                  | <b>0.003</b>           | 122.0 (24.5)                      | 134.6 (18.3) | 126.3 (19.8) | 124.1 (16.6) | 0.139   |
| Diastolic blood pressure, mmHg               | Mean (SD)                       | 78.8 (14.7)             | 76.9 (12.5)          | 82.4 (15.7)  | 0.257                  | 0.058                  | 74.3 (13.2)                       | 78.6 (11.5)  | 77.3 (13.4)  | 73.7 (11.6)  | 0.458   |
| <b>Oxygen saturation, %</b>                  | Mean (SD)                       | 94.3 (4.4)              | 93.3 (6.5)           | 97.4 (1.8)   | 0.831                  | <b>&lt;0.001</b>       | 91.1 (9.6)                        | 93.7 (4.7)   | 93.5 (6.2)   | 93.6 (8.7)   | 0.758   |
| <b>Respiratory rate, /min</b>                | Mean (SD)                       | 22.6 (5.5)              | 23.5 (12.4)          | 14.4 (4.0)   | 0.262                  | <b>&lt;0.001</b>       | 22.5 (4.6)                        | 22.9 (11.3)  | 25.1 (15.7)  | 21.0 (6.2)   | 0.312   |
| <b>WHO Clinical severity score (in full)</b> | No evidence of infection        | 0 (0.0%)                | 0 (0.0%)             | 29 (100.0%)  | 0.672                  | <b>&lt;0.001</b>       | 0 (0.0%)                          | 0 (0.0%)     | 0 (0.0%)     | 0 (0.0%)     | 0.100   |
|                                              | No limitation of activities     | 0 (0.0%)                | 0 (0.0%)             | 0 (0.0%)     |                        |                        | 0 (0.0%)                          | 0 (0.0%)     | 0 (0.0%)     | 0 (0.0%)     |         |
|                                              | Limitation of activities        | 1 (1.0%)                | 0 (0.0%)             | 0 (0.0%)     |                        |                        | 0 (0.0%)                          | 0 (0.0%)     | 0 (0.0%)     | 0 (0.0%)     |         |
|                                              | Hospitalized, no oxygen therapy | 28 (26.9%)              | 50 (31.4%)           | 0 (0.0%)     |                        |                        | 3 (17.6%)                         | 17 (30.4%)   | 24 (36.9%)   | 6 (28.6%)    |         |
|                                              | Oxygen by mask or nasal prongs  | 51 (49.0%)              | 74 (46.5%)           | 0 (0.0%)     |                        |                        | 8 (47.1%)                         | 30 (53.6%)   | 28 (43.1%)   | 8 (38.1%)    |         |
|                                              | Non-invasive ventilation        | 15 (14.4%)              | 20 (12.6%)           | 0 (0.0%)     |                        |                        | 4 (23.5%)                         | 7 (12.5%)    | 8 (12.3%)    | 1 (4.8%)     |         |
|                                              | Mechanical ventilation          | 5 (4.8%)                | 5 (3.1%)             | 0 (0.0%)     |                        |                        | 0 (0.0%)                          | 0 (0.0%)     | 3 (4.6%)     | 2 (9.5%)     |         |
|                                              | Ventilation with organ support  | 4 (3.8%)                | 10 (6.3%)            | 0 (0.0%)     |                        |                        | 2 (11.8%)                         | 2 (3.6%)     | 2 (3.1%)     | 4 (19.0%)    |         |
|                                              | Death                           | 0 (0.0%)                | 0 (0.0%)             | 0 (0.0%)     |                        |                        | 0 (0.0%)                          | 0 (0.0%)     | 0 (0.0%)     | 0 (0.0%)     |         |
| <i>COVID-19 diagnosis</i>                    |                                 |                         |                      |              |                        |                        |                                   |              |              |              |         |
| <b>PCR test</b>                              |                                 | 104 (100.0%)            | 159 (100.0%)         | 0 (0.0%)     | 1.000                  | <b>&lt;0.001</b>       | 17 (100.0%)                       | 56 (100.0%)  | 65 (100.0%)  | 21 (100.0%)  | 1.000   |
| Nosocomial                                   |                                 | 6 (5.8%)                | 7 (4.4%)             | 0 (0.0%)     | 0.772                  | 0.598                  | 0 (0.0%)                          | 4 (7.1%)     | 3 (4.6%)     | 0 (0.0%)     | 0.666   |
| <b>Antibody test</b>                         |                                 | 0 (0.0%)                | 0 (0.0%)             | 27 (93.1%)   | 1.000                  | <b>&lt;0.001</b>       | 0 (0.0%)                          | 0 (0.0%)     | 0 (0.0%)     | 0 (0.0%)     | 1.000   |
| <i>Chest x-ray / CT scan</i>                 |                                 |                         |                      |              |                        |                        |                                   |              |              |              |         |

|                               |                                         | COVID-19                |                      |             | p-value <sup>(a)</sup> | p-value <sup>(b)</sup> | Adjudicated Myocarditis Diagnosis |             |             |              | p-value      |       |
|-------------------------------|-----------------------------------------|-------------------------|----------------------|-------------|------------------------|------------------------|-----------------------------------|-------------|-------------|--------------|--------------|-------|
|                               |                                         | Without Primary Outcome | With Primary Outcome | Control     |                        |                        | Not present                       | Unlikely    | Probable    | Very likely  |              |       |
|                               |                                         | n = 104                 | n = 159              | n = 29      |                        |                        | n = 17                            | n = 56      | n = 65      | n = 21       |              |       |
|                               | <b>Typical of COVID-19</b>              | 72 (69.9%)              | 109 (74.7%)          | -           |                        | 12 (75.0%)             | 40 (78.4%)                        | 41 (68.3%)  | 16 (84.2%)  |              |              |       |
|                               | <b>Atypical of COVID-19</b>             | 10 (9.7%)               | 11 (7.5%)            | -           | 0.848                  | 2 (12.5%)              | 3 (5.9%)                          | 4 (6.7%)    | 2 (10.5%)   |              |              |       |
|                               | <b>Unlikely</b>                         | 3 (2.9%)                | 4 (2.7%)             | -           |                        | 2 (12.5%)              | 0 (0.0%)                          | 1 (1.7%)    | 1 (5.3%)    | <b>0.024</b> |              |       |
|                               | <b>Normal</b>                           | 18 (17.5%)              | 22 (15.1%)           | -           |                        | 0 (0.0%)               | 8 (15.7%)                         | 14 (23.3%)  | 0 (0.0%)    |              |              |       |
| <i>COVID-19 treatment</i>     |                                         |                         |                      |             |                        |                        |                                   |             |             |              |              |       |
|                               | Oxygen                                  | 75 (72.1%)              | 109 (68.6%)          | -           | 0.584                  | -                      | 14 (82.4%)                        | 39 (69.6%)  | 41 (63.1%)  | 15 (71.4%)   | 0.509        |       |
|                               | Non-invasive respiratory support        | 18 (17.3%)              | 31 (19.5%)           | -           | 0.747                  | -                      | 5 (29.4%)                         | 9 (16.1%)   | 11 (16.9%)  | 6 (28.6%)    | 0.386        |       |
|                               | <b>Invasive ventilation</b>             | 9 (8.7%)                | 14 (8.8%)            | -           | 1.000                  | -                      | 2 (11.8%)                         | 1 (1.8%)    | 5 (7.7%)    | 6 (28.6%)    | <b>0.004</b> |       |
|                               | IV inotrope                             | 4 (3.8%)                | 7 (4.4%)             | -           | 1.000                  | -                      | 1 (5.9%)                          | 2 (3.6%)    | 1 (1.5%)    | 3 (14.3%)    | 0.092        |       |
|                               | Antiviral                               | 24 (23.1%)              | 42 (26.4%)           | -           | 0.564                  | -                      | 9 (52.9%)                         | 15 (26.8%)  | 14 (21.5%)  | 4 (19.0%)    | 0.075        |       |
|                               | Steroid                                 | 45 (43.3%)              | 89 (56.0%)           | -           | 0.058                  | -                      | 12 (70.6%)                        | 31 (55.4%)  | 36 (55.4%)  | 10 (47.6%)   | 0.557        |       |
|                               | Intensive Care Unit                     | 9 (8.7%)                | 24 (15.1%)           | -           | 0.133                  | -                      | 5 (29.4%)                         | 5 (8.9%)    | 8 (12.3%)   | 6 (28.6%)    | 0.048        |       |
| <i>Cardiovascular History</i> |                                         |                         |                      |             |                        |                        |                                   |             |             |              |              |       |
|                               | Hypertension                            | 30 (28.8%)              | 56 (35.2%)           | 10 (34.5%)  | 0.347                  | 1.000                  | 8 (47.1%)                         | 21 (37.5%)  | 18 (27.7%)  | 9 (42.9%)    | 0.326        |       |
|                               | Renal impairment                        | 11 (10.6%)              | 7 (4.4%)             | 0 (0.0%)    | 0.078                  | 0.598                  | 1 (5.9%)                          | 1 (1.8%)    | 4 (6.2%)    | 1 (4.8%)     | 0.562        |       |
|                               | Diabetes mellitus                       | 25 (24.0%)              | 35 (22.0%)           | 2 (6.9%)    | 0.764                  | 0.075                  | 2 (11.8%)                         | 17 (30.4%)  | 13 (20.0%)  | 3 (14.3%)    | 0.294        |       |
|                               | Hypercholesterolaemia                   | 47 (45.2%)              | 76 (47.8%)           | 13 (44.8%)  | 0.706                  | 0.841                  | 10 (58.8%)                        | 30 (53.6%)  | 28 (43.1%)  | 8 (38.1%)    | 0.399        |       |
|                               | Smoking                                 | Never                   | 62 (59.6%)           | 106 (66.7%) | 18 (62.1%)             |                        | 12 (70.6%)                        | 38 (67.9%)  | 44 (67.7%)  | 12 (57.1%)   |              |       |
|                               |                                         | Former                  | 36 (34.6%)           | 44 (27.7%)  | 9 (31.0%)              | 0.458                  | 0.737                             | 4 (23.5%)   | 17 (30.4%)  | 17 (26.2%)   | 6 (28.6%)    | 0.530 |
|                               |                                         | Current                 | 6 (5.8%)             | 9 (5.7%)    | 2 (6.9%)               |                        |                                   | 1 (5.9%)    | 1 (1.8%)    | 4 (6.2%)     | 3 (14.3%)    |       |
|                               | Percutaneous coronary intervention      | 1 (1.0%)                | 10 (6.3%)            | 0 (0.0%)    | 0.054                  | 0.365                  | 3 (17.6%)                         | 2 (3.6%)    | 4 (6.2%)    | 1 (4.8%)     | 0.215        |       |
|                               | Coronary artery bypass graft surgery    | 2 (1.9%)                | 2 (1.3%)             | 0 (0.0%)    | 0.649                  | 1.000                  | 0 (0.0%)                          | 1 (1.8%)    | 1 (1.5%)    | 0 (0.0%)     | 1.000        |       |
|                               | CCS Angina Class                        | No Angina               | 96 (92.3%)           | 154 (96.9%) | 29 (100.0%)            |                        | 16 (94.1%)                        | 55 (98.2%)  | 64 (98.5%)  | 19 (90.5%)   |              |       |
|                               |                                         | Angina Class I-IV       | 8 (7.7%)             | 5 (3.1%)    | 0 (0.0%)               | 0.144                  | 1.000                             | 1 (5.9%)    | 1 (1.8%)    | 1 (1.5%)     | 2 (9.5%)     | 0.180 |
|                               | Heart failure                           | 1 (1.0%)                | 6 (3.8%)             | 0 (0.0%)    | 0.250                  | 0.593                  | 0 (0.0%)                          | 2 (3.6%)    | 3 (4.6%)    | 1 (4.8%)     | 1.000        |       |
|                               | Myocardial infarction                   | 7 (6.7%)                | 17 (10.7%)           | 0 (0.0%)    | 0.382                  | 0.079                  | 3 (17.6%)                         | 6 (10.7%)   | 6 (9.2%)    | 2 (9.5%)     | 0.758        |       |
|                               | Stroke or transient ischemic attack     | 2 (1.9%)                | 5 (3.1%)             | 3 (10.3%)   | 0.707                  | 0.108                  | 1 (5.9%)                          | 1 (1.8%)    | 3 (4.6%)    | 0 (0.0%)     | 0.625        |       |
|                               | Peripheral vascular disease             | 2 (1.9%)                | 1 (0.6%)             | 0 (0.0%)    | 0.564                  | 1.000                  | 1 (5.9%)                          | 0 (0.0%)    | 0 (0.0%)    | 0 (0.0%)     | 0.107        |       |
|                               | Cardiovascular disease and/or treatment | 52 (50.0%)              | 74 (46.5%)           | 14 (48.3%)  | 0.615                  | 1.000                  | 8 (47.1%)                         | 29 (51.8%)  | 26 (40.0%)  | 11 (52.4%)   | 0.560        |       |
| <i>Risk Scores</i>            |                                         |                         |                      |             |                        |                        |                                   |             |             |              |              |       |
|                               | <b>ISARIC-4c Mortality Score</b>        | Mean (SD)               | 6.76 (3.53)          | 6.36 (3.33) | 4.38 (3.30)            | 0.368                  | <b>0.003</b>                      | 7.00 (3.26) | 6.71 (3.42) | 5.88 (3.06)  | 6.38 (3.94)  | 0.426 |
|                               | <b>ISARIC-4c Mortality Risk, in %</b>   | Mean (SD)               | 13.5 (11.5)          | 12.1 (10.6) | 6.9 (8.4)              | 0.368                  | <b>0.003</b>                      | 14.0 (10.7) | 13.2 (11.4) | 10.4 (9.4)   | 12.8 (11.7)  | 0.426 |
|                               | QRisk3 10y CVD Risk, in %               | Mean (SD)               | 16.0 (14.0)          | 13.5 (11.1) | 13.1 (10.0)            | 0.401                  | 0.984                             | 12.5 (7.9)  | 15.5 (12.8) | 12.0 (9.7)   | 14.3 (13.1)  | 0.724 |



|                                                     |                 | COVID-19                |                      |               | Control      | p-value <sup>(a)</sup> | p-value <sup>(b)</sup> | Adjudicated Myocarditis Diagnosis |                |                 |                  | p-value |
|-----------------------------------------------------|-----------------|-------------------------|----------------------|---------------|--------------|------------------------|------------------------|-----------------------------------|----------------|-----------------|------------------|---------|
|                                                     |                 | Without Primary Outcome | With Primary Outcome |               |              |                        |                        | Not present                       | Unlikely       | Probable        | Very likely      |         |
|                                                     |                 | n = 104                 | n = 159              | n = 29        | n = 17       | n = 56                 | n = 65                 | n = 21                            |                |                 |                  |         |
| Charlson Comorbidity Index                          | Mean (SD)       | 2.10 (2.21)             | 1.89 (1.82)          | 1.45 (1.21)   | 0.747        | 0.412                  | 1.71 (1.93)            | 2.07 (2.01)                       | 1.86 (1.79)    | 1.62 (1.24)     | 0.793            |         |
| <i>Pre-existing maintenance medication</i>          |                 |                         |                      |               |              |                        |                        |                                   |                |                 |                  |         |
| Aspirin                                             |                 | 8 (7.7%)                | 12 (7.5%)            | 0 (0.0%)      | 1.000        | 0.218                  | 3 (17.6%)              | 4 (7.1%)                          | 4 (6.2%)       | 1 (4.8%)        | 0.419            |         |
| Statin                                              |                 | 25 (24.0%)              | 46 (28.9%)           | 10 (34.5%)    | 0.398        | 0.659                  | 7 (41.2%)              | 20 (35.7%)                        | 13 (20.0%)     | 6 (28.6%)       | 0.159            |         |
| Beta-blocker                                        |                 | 15 (14.4%)              | 20 (12.6%)           | 2 (6.9%)      | 0.712        | 0.537                  | 3 (17.6%)              | 7 (12.5%)                         | 5 (7.7%)       | 5 (23.8%)       | 0.208            |         |
| ACE inhibitor                                       |                 | 20 (19.2%)              | 35 (22.0%)           | 4 (13.8%)     | 0.644        | 0.456                  | 6 (35.3%)              | 11 (19.6%)                        | 13 (20.0%)     | 5 (23.8%)       | 0.542            |         |
| ARB                                                 |                 | 9 (8.7%)                | 10 (6.3%)            | 2 (6.9%)      | 0.476        | 1.000                  | 0 (0.0%)               | 6 (10.7%)                         | 3 (4.6%)       | 1 (4.8%)        | 0.447            |         |
| Oral anticoagulation                                |                 | 6 (5.8%)                | 8 (5.0%)             | 1 (3.4%)      | 0.786        | 1.000                  | 1 (5.9%)               | 3 (5.4%)                          | 3 (4.6%)       | 1 (4.8%)        | 1.000            |         |
| <i>Blood results, index admission</i>               |                 |                         |                      |               |              |                        |                        |                                   |                |                 |                  |         |
| Haemoglobin, g/l                                    | Mean (SD)       | 141 (17)                | 141 (16)             | 143 (12)      | 0.970        | 0.655                  | 142 (15)               | 140 (17)                          | 140 (15)       | 143 (16)        | 0.624            |         |
| <b>Platelet count, 10<sup>9</sup>/l</b>             | Mean (SD)       | 238 (84)                | 237 (94)             | 259 (58)      | 0.435        | <b>0.006</b>           | 264 (137)              | 217 (75)                          | 244 (93)       | 248 (95)        | 0.344            |         |
| White cell count, 10 <sup>9</sup> /l                | Mean (SD)       | 7.56 (3.34)             | 7.29 (5.52)          | 7.51 (3.11)   | 0.055        | 0.172                  | 7.32 (4.82)            | 6.68 (2.65)                       | 7.73 (7.76)    | 7.50 (2.98)     | 0.676            |         |
| <b>Lymphocyte count, 10<sup>9</sup>/l</b>           | Mean (SD)       | 1.21 (0.67)             | 1.53 (4.66)          | 1.88 (0.64)   | 0.823        | <b>&lt;0.001</b>       | 1.02 (0.48)            | 1.08 (0.52)                       | 2.11 (7.26)    | 1.35 (0.65)     | 0.215            |         |
| <b>Peak D-Dimer, ng/ml</b>                          | Mean (SD)       | 1511 (4463)             | 1740 (5493)          | 311 (303)     | 0.722        | <b>0.026</b>           | 2022 (4159)            | 916 (2132)                        | 1754 (6648)    | 3127 (7431)     | 0.881            |         |
| <b>Peak HbA1c, mmol/mol</b>                         | Mean (SD)       | 47.6 (16.9)             | 48.0 (18.4)          | 44.2 (22.1)   | 0.864        | <b>0.020</b>           | 57.3 (32.3)            | 50.5 (18.1)                       | 44.8 (13.5)    | 44.9 (19.2)     | 0.100            |         |
| Initial creatinine, mmol/l                          | Mean (SD)       | 84.3 (29.6)             | 81.1 (37.1)          | 75.9 (24.2)   | 0.069        | 0.564                  | 96.9 (55.3)            | 73.8 (21.9)                       | 78.3 (28.2)    | 96.6 (62.7)     | 0.316            |         |
| <b>Initial eGFR, ml/min/1.73m<sup>2</sup></b>       | Mean (SD)       | 83.7 (21.8)             | 88.5 (23.4)          | 89.5 (19.5)   | <b>0.034</b> | 0.900                  | 82.5 (27.7)            | 92.6 (18.7)                       | 89.4 (23.5)    | 79.8 (28.4)     | 0.376            |         |
| Initial eGFR <60 ml/min/1.73m <sup>2</sup>          |                 | 16 (15.4%)              | 19 (11.9%)           | 1 (3.4%)      | 0.460        | 0.322                  | 2 (11.8%)              | 4 (7.1%)                          | 8 (12.3%)      | 5 (23.8%)       | 0.256            |         |
| Peak creatinine, µmol/l                             | Mean (SD)       | 92 (40)                 | 103 (95)             | 90 (46)       | 0.123        | 0.752                  | 99 (54)                | 89 (57)                           | 96 (79)        | 168 (187)       | 0.506            |         |
| Minimum eGFR, ml/min/1.73m <sup>2</sup>             | Mean (SD)       | 79.2 (22.8)             | 81.6 (27.4)          | 77.8 (29.0)   | 0.124        | 0.799                  | 79.8 (27.1)            | 84.8 (23.4)                       | 83.5 (26.5)    | 68.7 (37.0)     | 0.454            |         |
| Minimum eGFR <60 ml/min/1.73m <sup>2</sup>          |                 | 23 (22.3%)              | 28 (17.6%)           | 1 (20.0%)     | 0.425        | 1.000                  | 2 (11.8%)              | 7 (12.5%)                         | 12 (18.5%)     | 7 (33.3%)       | 0.200            |         |
| <b>Peak ferritin, µg/l</b>                          | Median (IQR)    | 348 (107, 919)          | 360 (180, 864)       | 118 (69, 166) | 0.333        | <b>&lt;0.001</b>       | 454 (184, 835)         | 359 (212, 1082)                   | 332 (154, 692) | 562 (198, 1860) | 0.441            |         |
| <b>Initial high sensitivity troponin I, ng/l</b>    | Median (IQR)    | 4 (2, 7)                | 4 (3, 10)            | 4 (4, 4)      | <b>0.003</b> | 0.519                  | 5 (4, 8)               | 4 (3, 8)                          | 4 (3, 7)       | 16 (4, 51)      | 0.146            |         |
| <b>Initial high sensitivity troponin I, males</b>   | <1.2 pg/ml      | 7 (11.5%)               | 0 (0.0%)             | 0 (0.0%)      | <b>0.017</b> | 0.052                  | 0 (0.0%)               | 0 (0.0%)                          | 0 (0.0%)       | 0 (0.0%)        | 0.745            |         |
|                                                     | 1.2 - 5.0 pg/ml | 33 (54.1%)              | 44 (55.7%)           | 15 (88.2%)    |              |                        | 6 (54.5%)              | 16 (57.1%)                        | 18 (58.1%)     | 4 (44.4%)       |                  |         |
|                                                     | >5 - 34 pg/ml   | 16 (26.2%)              | 25 (31.6%)           | 2 (11.8%)     |              |                        | 3 (27.3%)              | 9 (32.1%)                         | 8 (25.8%)      | 5 (55.6%)       |                  |         |
|                                                     | >34 pg/ml       | 5 (8.2%)                | 10 (12.7%)           | 0 (0.0%)      |              |                        | 2 (18.2%)              | 3 (10.7%)                         | 5 (16.1%)      | 0 (0.0%)        |                  |         |
| <b>Initial high sensitivity troponin I, females</b> | <1.2 pg/ml      | 6 (15.8%)               | 5 (8.5%)             | 0 (0.0%)      | 0.320        | 0.557                  | 1 (25.0%)              | 2 (10.0%)                         | 1 (3.8%)       | 1 (11.1%)       | <b>&lt;0.001</b> |         |
|                                                     | 1.2 - 5.0 pg/ml | 23 (60.5%)              | 37 (62.7%)           | 7 (77.8%)     |              |                        | 1 (25.0%)              | 14 (70.0%)                        | 21 (80.8%)     | 1 (11.1%)       |                  |         |
|                                                     | >5 - 16 pg/ml   | 7 (18.4%)               | 8 (13.6%)            | 2 (22.2%)     |              |                        | 2 (50.0%)              | 3 (15.0%)                         | 3 (11.5%)      | 0 (0.0%)        |                  |         |
|                                                     | >16 pg/ml       | 2 (5.3%)                | 9 (15.3%)            | 0 (0.0%)      |              |                        | 0 (0.0%)               | 1 (5.0%)                          | 1 (3.8%)       | 7 (77.8%)       |                  |         |

|                                                |                                        | COVID-19                |                      |                | p-value <sup>(a)</sup> | p-value <sup>(b)</sup> | Adjudicated Myocarditis Diagnosis |                 |                |                  | p-value          |
|------------------------------------------------|----------------------------------------|-------------------------|----------------------|----------------|------------------------|------------------------|-----------------------------------|-----------------|----------------|------------------|------------------|
|                                                |                                        | Without Primary Outcome | With Primary Outcome | Control        |                        |                        | Not present                       | Unlikely        | Probable       | Very likely      |                  |
|                                                |                                        | n = 104                 | n = 159              | n = 29         |                        |                        | n = 17                            | n = 56          | n = 65         | n = 21           |                  |
| <b>Initial high sensitivity troponin I</b>     | <1.2 pg/ml                             | 13 (13.1%)              | 5 (3.6%)             | 0 (0.0%)       | <b>0.031</b>           | 0.061                  | 1 (6.7%)                          | 2 (4.2%)        | 1 (1.8%)       | 1 (5.6%)         | <b>0.041</b>     |
|                                                | 1.2 - 5.0 pg/ml                        | 56 (56.6%)              | 81 (58.7%)           | 22 (84.6%)     |                        |                        | 7 (46.7%)                         | 30 (62.5%)      | 39 (68.4%)     | 5 (27.8%)        |                  |
|                                                | >5 pg/ml - 99 <sup>th</sup> percentile | 23 (23.2%)              | 33 (23.9%)           | 4 (15.4%)      |                        |                        | 5 (33.3%)                         | 12 (25.0%)      | 11 (19.3%)     | 5 (27.8%)        |                  |
|                                                | >99 <sup>th</sup> percentile           | 7 (7.1%)                | 19 (13.8%)           | 0 (0.0%)       |                        |                        | 2 (13.3%)                         | 4 (8.3%)        | 6 (10.5%)      | 7 (38.9%)        |                  |
| <b>Peak high sensitivity troponin I, ng/l</b>  | Median (IQR)                           | 4.0 (2.0, 10.5)         | 4.0 (3.0, 12.8)      | 4.0 (4.0, 4.0) | <b>0.009</b>           | 0.358                  | 6.0 (4.0, 10.0)                   | 4.0 (3.0, 10.0) | 4.0 (3.0, 9.0) | 30.0 (3.5, 83.8) | 0.158            |
| <b>Peak high sensitivity troponin I, males</b> | <1.2 pg/ml                             | 6 (9.8%)                | 0 (0.0%)             | 0 (0.0%)       | <b>0.020</b>           | <b>0.044</b>           | 0 (0.0%)                          | 0 (0.0%)        | 0 (0.0%)       | 0 (0.0%)         | 0.906            |
|                                                | 1.2 - 5.0 pg/ml                        | 29 (47.5%)              | 43 (54.4%)           | 14 (87.5%)     |                        |                        | 6 (54.5%)                         | 15 (53.6%)      | 18 (58.1%)     | 4 (44.4%)        |                  |
|                                                | >5 - 34 pg/ml                          | 19 (31.1%)              | 21 (26.6%)           | 2 (12.5%)      |                        |                        | 3 (27.3%)                         | 9 (32.1%)       | 6 (19.4%)      | 3 (33.3%)        |                  |
|                                                | >34 pg/ml                              | 7 (11.5%)               | 15 (19.0%)           | 0 (0.0%)       |                        |                        | 2 (18.2%)                         | 4 (14.3%)       | 7 (22.6%)      | 2 (22.2%)        |                  |
| Peak high sensitivity troponin I, females      | <1.2 pg/ml                             | 6 (15.8%)               | 5 (8.5%)             | 0 (0.0%)       | 0.559                  | 0.362                  | 1 (25.0%)                         | 2 (10.0%)       | 1 (3.8%)       | 1 (11.1%)        | <b>&lt;0.001</b> |
|                                                | 1.2 - 5.0 pg/ml                        | 21 (55.3%)              | 35 (59.3%)           | 7 (77.8%)      |                        |                        | 0 (0.0%)                          | 14 (70.0%)      | 20 (76.9%)     | 1 (11.1%)        |                  |
|                                                | >5 - 16 pg/ml                          | 6 (15.8%)               | 7 (11.9%)            | 2 (22.2%)      |                        |                        | 2 (50.0%)                         | 3 (15.0%)       | 2 (7.7%)       | 0 (0.0%)         |                  |
|                                                | >16 pg/ml                              | 5 (13.2%)               | 12 (20.3%)           | 0 (0.0%)       |                        |                        | 1 (25.0%)                         | 1 (5.0%)        | 3 (11.5%)      | 7 (77.8%)        |                  |
| <b>Peak high sensitivity troponin I</b>        | <1.2 pg/ml                             | 12 (12.1%)              | 5 (3.6%)             | 0 (0.0%)       | <b>0.034</b>           | <b>0.021</b>           | 1 (6.7%)                          | 2 (4.2%)        | 1 (1.8%)       | 1 (5.6%)         | <b>0.013</b>     |
|                                                | 1.2 - 5.0 pg/ml                        | 50 (50.5%)              | 78 (56.5%)           | 21 (84.0%)     |                        |                        | 6 (40.0%)                         | 29 (60.4%)      | 38 (66.7%)     | 5 (27.8%)        |                  |
|                                                | >5 pg/ml - 99 <sup>th</sup> percentile | 25 (25.3%)              | 28 (20.3%)           | 4 (16.0%)      |                        |                        | 5 (33.3%)                         | 12 (25.0%)      | 8 (14.0%)      | 3 (16.7%)        |                  |
|                                                | >99 <sup>th</sup> percentile           | 12 (12.1%)              | 27 (19.6%)           | 0 (0.0%)       |                        |                        | 3 (20.0%)                         | 5 (10.4%)       | 10 (17.5%)     | 9 (50.0%)        |                  |
| <b>Peak fibrinogen, g/l</b>                    | Mean (SD)                              | 7.13 (2.37)             | 6.04 (2.54)          | 3.41 (0.48)    | 0.376                  | <b>0.003</b>           | 6.70 (2.75)                       | 4.69 (2.70)     | 5.65 (2.22)    | 7.83 (1.72)      | 0.240            |
| <b>Peak CRP, mg/l</b>                          | Median (IQR)                           | 131 (40, 206)           | 104 (37, 181)        | 2 (1, 5)       | 0.385                  | <b>&lt;0.001</b>       | 130 (77, 180)                     | 107 (45, 164)   | 91 (35, 181)   | 121 (17, 350)    | 0.584            |
| <b>Peak CRP, mg/l</b>                          | <5 mg/l                                | 9 (8.7%)                | 10 (6.3%)            | 20 (71.4%)     | 0.529                  | <b>&lt;0.001</b>       | 0 (0.0%)                          | 2 (3.6%)        | 4 (6.2%)       | 4 (19.0%)        | 0.274            |
|                                                | ≥5, <10 mg/l                           | 2 (1.9%)                | 6 (3.8%)             | 4 (14.3%)      |                        |                        | 0 (0.0%)                          | 3 (5.4%)        | 3 (4.6%)       | 0 (0.0%)         |                  |
|                                                | ≥10 mg/l                               | 92 (89.3%)              | 143 (89.9%)          | 4 (14.3%)      |                        |                        | 17 (100.0%)                       | 51 (91.1%)      | 58 (89.2%)     | 17 (81.0%)       |                  |
| Peak sodium, mmol/l                            | Mean (SD)                              | 140.1 (4.3)             | 140.3 (4.0)          | 139.4 (2.5)    | 0.336                  | 0.157                  | 138.8 (4.2)                       | 139.8 (3.2)     | 140.8 (3.8)    | 141.8 (5.6)      | 0.233            |
| <b>Albumin, g/l</b>                            | Mean (SD)                              | 34.0 (4.9)              | 34.2 (5.2)           | 40.0 (5.3)     | 0.756                  | <b>&lt;0.001</b>       | 32.1 (5.0)                        | 35.0 (4.4)      | 33.8 (6.0)     | 34.8 (4.8)       | 0.273            |
| Initial MCV, fl                                | Mean (SD)                              | - (-)                   | 89.6 (6.1)           | 91.6 (4.1)     | -                      | 0.109                  | 89.0 (4.5)                        | 88.4 (7.2)      | 90.5 (5.7)     | 90.5 (5.0)       | 0.551            |
| Initial RDW, %                                 | Mean (SD)                              | - (-)                   | 13.1 (1.4)           | 13.1 (0.5)     | -                      | 0.164                  | 13.1 (0.8)                        | 13.3 (1.9)      | 13.1 (1.0)     | 13.1 (1.2)       | 0.825            |
| Peak MCV, fl                                   | Mean (SD)                              | - (-)                   | 92.8 (6.3)           | 91.9 (4.2)     | -                      | 0.221                  | 92.9 (4.8)                        | 90.9 (6.6)      | 93.6 (5.8)     | 95.2 (6.7)       | 0.094            |
| RDW at peak MCV, %                             | Mean (SD)                              | - (-)                   | 13.3 (1.3)           | 13.2 (0.6)     | -                      | 0.602                  | 13.3 (0.9)                        | 13.3 (1.5)      | 13.3 (1.2)     | 13.8 (1.6)       | 0.399            |

769 Table S1: <sup>(a)</sup> COVID-19 patients, without primary outcome vs. with primary outcome. <sup>(b)</sup>: COVID-19 patients with primary outcome vs. controls. Ethnicity: Indian (0), Pakistani  
770 (0), Bangladeshi (0), Other Asian n=14 (8.8%), Black Caribbean (0), Black African n=2 (1.2%), Chinese n=1 (0.6%), Other (n=1 (0.9%), White, n=139 (87.4%). Missing data  
771 in post-COVID-19 patients: D-Dimer, n=62; HbA1c, n=23; ferritin, n=18; troponin I, n=21. Missing data in Control patients: D-Dimer, n=15; HbA1c, n=5; ferritin, n=5;  
772 troponin I, n=4. CCS – Canadian Cardiovascular Society; CRP – C-reactive protein; GFR - glomerular filtration rate was estimated using the Chronic Kidney Disease  
773 Epidemiology equation<sup>6</sup>, ISARIC-4C - Coronavirus Clinical Characterisation Consortium; MCV – mean cell volume; PCR – polymerase chain reaction; SD – standard  
774 deviation; RDW – red cell distribution width; SIMD - Scottish Index of Multiple Deprivation; TIA – transient ischaemic attack; WHO – World Health Organization. In the  
775 control group, the Abbott Architect CMIA SARS-CoV-2 IgG assay<sup>8</sup> was used to confirm absence of prior infection with COVID-19. The primary outcome evaluation (visit 2)  
776 was scheduled 28-60 days post-discharge. \*Categorical data are summarized as frequency and percentage, and compared between groups using Fisher’s Exact tests. Continuous  
777 data are summarized as mean and standard deviation, or median and interquartile range (IQR, defined as the upper and lower quartiles), and compared between groups using  
778 Kruskal-Wallis tests. All p-values are two-sided. No adjustments were made for multiple comparisons.

779 **Table S2. Expanded - Multisystem phenotyping: serial electrocardiography, biomarkers of inflammation, metabolism, renal function,**  
780 **and hemostasis, and heart, lung, and kidney imaging at 28-60 days post-discharge.**

|                                               | COVID-19<br>n = 159 | Controls<br>n = 29 | P-value          | Myocarditis                 |                          |                          |                             | P-value*     |
|-----------------------------------------------|---------------------|--------------------|------------------|-----------------------------|--------------------------|--------------------------|-----------------------------|--------------|
|                                               |                     |                    |                  | Not present<br>n = 17 (11%) | Unlikely<br>n = 56 (35%) | Probable<br>n = 65 (41%) | Very likely<br>n = 21 (13%) |              |
| <i>Electrocardiogram, n (%)</i>               |                     |                    |                  |                             |                          |                          |                             |              |
| <i>Admission (n = 150)</i>                    |                     |                    |                  |                             |                          |                          |                             |              |
| <b>Myopericarditis criteria</b>               | 31 (20.7)           | 0 (0)              | <b>0.003</b>     | 3 (17.6)                    | 9 (16.7)                 | 13 (22.4)                | 6 (28.6)                    | 0.646        |
| Premature atrial contraction                  | 2 (1.3)             | 0 (0)              | 1.000            | 0 (0.0)                     | 0 (0.0)                  | 2 (3.1)                  | 0 (0.0)                     | 0.710        |
| <b>Premature ventricular contraction</b>      | 3 (1.9)             | 0 (0)              | 1.000            | 1 (5.9)                     | 0 (0.0)                  | 0 (0.0)                  | 2 (9.5)                     | <b>0.013</b> |
| Atrial fibrillation or flutter, n = 9 missing | 5 (3.3)             | 0 (0)              | 1.000            | 0 (0.0)                     | 2 (3.6)                  | 2 (3.4)                  | 1 (4.8)                     | 1.000        |
| <i>Enrolment (n = 147)</i>                    |                     |                    |                  |                             |                          |                          |                             |              |
| <b>Myopericarditis criteria</b>               | 47 (32.0)           | 0 (0)              | <b>&lt;0.001</b> | 3 (21.4)                    | 16 (30.2)                | 20 (32.3)                | 8 (44.4)                    | 0.586        |
| Premature atrial contraction                  | 7 (4.4)             | 0 (0)              | 0.598            | 1 (5.9)                     | 3 (5.4)                  | 2 (3.1)                  | 1 (4.8)                     | 0.840        |
| Premature ventricular contraction             | 1 (0.6)             | 0 (0)              | 1.000            | 0 (0.0)                     | 1 (1.8)                  | 0 (0.0)                  | 0 (0.0)                     | 0.591        |
| Atrial fibrillation or flutter                | 3 (2.0)             | 0 (0)              | 1.000            | 0 (0.0)                     | 1 (1.9)                  | 1 (1.6)                  | 1 (5.9)                     | 0.623        |
| <i>28-60 days post-discharge (n = 143)</i>    |                     |                    |                  |                             |                          |                          |                             |              |
| <b>Myopericarditis criteria</b>               | 33 (23.1)           | 0 (0)              | <b>0.002</b>     | 2 (14.3)                    | 10 (20.4)                | 14 (23.3)                | 7 (35.0)                    | 0.546        |
| Premature atrial contraction                  | 8 (5.0)             | 0 (0)              | 0.612            | 1 (5.9)                     | 3 (5.4)                  | 3 (4.6)                  | 1 (4.8)                     | 1.000        |
| Premature ventricular contraction             | 2 (1.3)             | 0 (0)              | 1.000            | 1 (5.9)                     | 0 (0.0)                  | 1 (1.5)                  | 0 (0.0)                     | 0.220        |
| Atrial fibrillation or flutter                | 2 (1.4)             | 0 (0)              | 1.000            | 0 (0.0)                     | 0 (0.0)                  | 1 (1.6)                  | 1 (5.0)                     | 0.535        |

|                                                                    | COVID-19<br>n = 159 | Controls<br>n = 29 | P-value          | Myocarditis                 |                          |                          |                             | P-value*     |
|--------------------------------------------------------------------|---------------------|--------------------|------------------|-----------------------------|--------------------------|--------------------------|-----------------------------|--------------|
|                                                                    |                     |                    |                  | Not present<br>n = 17 (11%) | Unlikely<br>n = 56 (35%) | Probable<br>n = 65 (41%) | Very likely<br>n = 21 (13%) |              |
| <i>CT chest 28-60 days post-discharge</i>                          |                     |                    |                  |                             |                          |                          |                             |              |
| <b>Ground glass opacity and/or consolidation, n (%)</b>            | 70 (44.6)           | 1 (4.2)            | <b>&lt;0.001</b> | 10 (66.7)                   | 26 (46.4)                | 24 (36.9)                | 10 (47.6)                   | 0.201        |
| <b>Reticulation and/or architectural distortion, n (%)</b>         | 47 (29.9)           | 1 (4.2)            | <b>0.006</b>     | 6 (40.0)                    | 15 (26.8)                | 18 (27.7)                | 8 (38.1)                    | 0.600        |
| Atelectasis, n (%)                                                 | 13 (8.3)            | 0 (0.0)            | 0.222            | 1 (6.7)                     | 7 (12.5)                 | 4 (6.2)                  | 1 (4.8)                     | 0.600        |
| Pulmonary arterial thrombus, n (%)                                 | 5 (3.3)             | 0 (0.0)            | 1.000            | 0 (0.0)                     | 2 (3.6)                  | 2 (3.1)                  | 1 (5.3)                     | 0.905        |
| <b>Visual estimate of % of total lung area abnormal, mean (SD)</b> | 14.3 (19.0)         | 0.1 (0.5)          | <b>&lt;0.001</b> | 19.3 (22.5)                 | 12.7 (17.6)              | 12.3 (17.5)              | 21.1 (23.4)                 | 0.286        |
| <b>&lt;20%, n (%)</b>                                              | 107 (68.2)          | 23 (95.8)          | <b>0.006</b>     | 9 (60.0)                    | 38 (67.9)                | 48 (73.8)                | 12 (57.1)                   | 0.324        |
| <b>≥20%, n (%)</b>                                                 | 38 (24.2)           | 0 (0.0)            |                  | 3 (20.0)                    | 15 (26.8)                | 14 (21.5)                | 6 (28.6)                    |              |
| <b>≥50%, n (%)</b>                                                 | 12 (7.6)            | 1 (4.2)            |                  | 3 (20.0)                    | 3 (5.4)                  | 3 (4.6)                  | 3 (14.3)                    |              |
| <i>CT coronary angiogram 28-60 days post-discharge</i>             |                     |                    |                  |                             |                          |                          |                             |              |
| Coronary calcium - Agatston score, mean (SD)                       | 144 (502)           | 95 (297)           | 0.238            | 44 (61)                     | 253 (730)                | 91 (363)                 | 91 (162)                    | 0.071        |
| CADS-RADS score, n (%)                                             |                     |                    |                  |                             |                          |                          |                             |              |
| Level 0                                                            | 77 (50.0)           | 13 (52.0)          |                  | 3 (21.4)                    | 23 (41.1)                | 40 (63.5)                | 11 (52.4)                   |              |
| Level 1                                                            | 42 (27.3)           | 7 (32.0)           |                  | 7 (50.0)                    | 19 (33.9)                | 11 (17.5)                | 5 (23.8)                    |              |
| Level 2                                                            | 11 (7.1)            | 2 (8.0)            | 0.974            | 0 (0.0)                     | 5 (8.9)                  | 4 (6.3)                  | 2 (9.5)                     | <b>0.013</b> |
| Level 3                                                            | 7 (4.5)             | 1 (4.0)            |                  | 2 (14.3)                    | 1 (1.8)                  | 4 (6.3)                  | 0 (0.0)                     |              |
| Level 4                                                            | 14 (9.1)            | 1 (4.0)            |                  | 1 (7.1)                     | 8 (14.3)                 | 2 (3.2)                  | 3 (14.3)                    |              |
| Level 5                                                            | 3 (1.9)             | 0 (0.0)            |                  | 1 (7.1)                     | 0 (0.0)                  | 2 (3.2)                  | 0 (0.0)                     |              |
| Obstructive coronary artery disease, n (%)                         | 21 (13.9)           | 1 (4.0)            | 0.325            | 3 (20.0)                    | 7 (12.7)                 | 7 (11.3)                 | 4 (21.1)                    | 0.555        |
| <i>FFR<sub>CT</sub> patient-level (all coronary arteries)</i>      |                     |                    |                  |                             |                          |                          |                             |              |
| Median FFR <sub>CT</sub> , mean (SD)                               | 0.93 (0.03)         | 0.93 (0.02)        | 0.109            | 0.92 (0.03)                 | 0.93 (0.04)              | 0.93 (0.03)              | 0.92 (0.04)                 | 0.308        |
| Minimum FFR <sub>CT</sub> , mean (SD)                              | 0.80 (0.10)         | 0.84 (0.09)        | 0.006            | 0.82 (0.08)                 | 0.79 (0.11)              | 0.81 (0.09)              | 0.76 (0.13)                 | 0.541        |

|                                                                   | COVID-19<br>n = 159 | Controls<br>n = 29 | P-value          | Myocarditis                 |                          |                          |                             | P-value*         |
|-------------------------------------------------------------------|---------------------|--------------------|------------------|-----------------------------|--------------------------|--------------------------|-----------------------------|------------------|
|                                                                   |                     |                    |                  | Not present<br>n = 17 (11%) | Unlikely<br>n = 56 (35%) | Probable<br>n = 65 (41%) | Very likely<br>n = 21 (13%) |                  |
| Minimum FFR <sub>CT</sub> ≤0.80, n (%)                            | 50 (37.9)           | 7 (28.0)           | 0.377            | 5 (41.7)                    | 16 (34.8)                | 20 (35.7)                | 9 (50.0)                    | 0.655            |
| <i>Cardiovascular MRI 28-60 days post-discharge</i>               |                     |                    |                  |                             |                          |                          |                             |                  |
| LV end-diastolic volume index, mean (SD), mL/m <sup>2</sup>       | 75.9 (17.0)         | 73.9 (18.7)        | 0.326            | 77.2 (17.9)                 | 74.1 (16.6)              | 77.4 (17.1)              | 75.2 (17.7)                 | 0.881            |
| <b>LV end-systolic volume index, mean (SD), mL/m<sup>2</sup></b>  | 35.3 (12.8)         | 30.2 (13.7)        | <b>0.012</b>     | 34.6 (11.1)                 | 33.7 (11.7)              | 36.3 (14.2)              | 36.6 (12.4)                 | 0.815            |
| <b>LV ejection fraction, mean (SD), %</b>                         | 54.1 (9.7)          | 60.4 (9.3)         | <b>&lt;0.001</b> | 54.8 (9.8)                  | 55.1 (10.1)              | 54.0 (8.6)               | 51.3 (11.5)                 | 0.433            |
| LV ejection fraction reduced, males <48%, n (%)                   | 19 (21.3)           | 2 (12.5)           | 0.518            | 2 (15.4)                    | 6 (17.1)                 | 8 (24.2)                 | 3 (33.3)                    | 0.665            |
| <b>LV ejection fraction reduced, females &lt;51%, n (%)</b>       | 12 (17.6)           | 0 (0.0)            | 0.346            | 1 (25.0)                    | 0 (0.0)                  | 6 (18.8)                 | 5 (41.7)                    | <b>0.012</b>     |
| <b>LV mass index, mean (SD), g/m<sup>2</sup></b>                  | 91.8 (25.6)         | 119.4 (26.8)       | <b>&lt;0.001</b> | 100.9 (18.9)                | 93.2 (21.5)              | 89.7 (27.8)              | 87.6 (31.6)                 | 0.170            |
| <b>LV global longitudinal strain, mean (SD), %</b>                | -14.2 (3.0)         | -14.5 (6.9)        | <b>0.031</b>     | -13.7 (3.1)                 | -13.9 (2.9)              | -14.6 (3.0)              | -14.1 (3.0)                 | 0.375            |
| <b>LV global circumferential strain, mean (SD), %</b>             | -17.0 (3.3)         | -17.9 (3.0)        | 0.153            | -17.4 (3.6)                 | -17.0 (3.4)              | -17.1 (3.1)              | -16.6 (3.4)                 | 0.801            |
| <b>LV global radial strain, mean (SD), %</b>                      | 28.3 (7.8)          | 30.6 (7.7)         | 0.164            | 29.3 (8.4)                  | 28.4 (8.3)               | 28.3 (7.3)               | 27.1 (7.9)                  | 0.780            |
| <b>RV end-diastolic volume index, mean (SD), mL/m<sup>2</sup></b> | 73.3 (17.7)         | 79.7 (14.1)        | <b>0.019</b>     | 77.8 (18.7)                 | 72.7 (19.7)              | 72.6 (17.0)              | 73.3 (13.9)                 | 0.760            |
| RV end-systolic volume index, mean (SD), mL/m <sup>2</sup>        | 35.9 (11.3)         | 34.4 (10.0)        | 0.948            | 34.6 (12.4)                 | 36.6 (11.9)              | 35.0 (11.5)              | 38.1 (8.3)                  | 0.487            |
| <b>RV ejection fraction, mean (SD), %</b>                         | 50.9 (10.5)         | 58.5 (9.3)         | <b>&lt;0.001</b> | 54.6 (15.9)                 | 49.9 (9.5)               | 51.9 (9.0)               | 47.5 (11.4)                 | 0.210            |
| RV global longitudinal strain, mean (SD), %                       | -17.2 (5.9)         | -19.0 (5.8)        | 0.165            | -14.4 (9.5)                 | -17.5 (5.4)              | -18.1 (5.3)              | -15.6 (4.3)                 | 0.130            |
| <i>Myocardial tissue characterization</i>                         |                     |                    |                  |                             |                          |                          |                             |                  |
| Increased global T1 (>1233 ms), n (%)                             | 55 (34.8)           | 5 (19.2)           | 0.174            | 2 (12.5)                    | 14 (25.0)                | 31 (46.2)                | 9 (42.9)                    | <b>0.016</b>     |
| Increased global T2 (>44 ms), n (%)                               | 10 (6.3)            | 0 (0.0)            | 0.312            | 0 (0.0)                     | 0 (0.0)                  | 6 (9.2)                  | 4 (19.0)                    | <b>0.007</b>     |
| T2 ratio (myocardium/ serratus anterior muscle)                   | 1.7 (0.2)           | 1.6 (0.1)          | 0.180            | 1.6 (0.2)                   | 1.6 (0.2)                | 1.8 (0.2)                | 1.8 (0.3)                   | <b>&lt;0.001</b> |
| <b>Increased global extracellular volume (&gt;27.4%), n (%)</b>   | 71 (49.7)           | 5 (20.8)           | <b>0.014</b>     | 1 (7.7)                     | 22 (41.5)                | 35 (60.3)                | 13 (68.4)                   | <b>&lt;0.001</b> |
| <i>Late gadolinium enhancement</i>                                |                     |                    |                  |                             |                          |                          |                             |                  |
| Myocardial late gadolinium enhancement, n (%)                     | 30 (19.0)           | 2 (7.7)            | 0.262            | 4 (25.0)                    | 7 (12.5)                 | 13 (20.0)                | 6 (28.6)                    | 0.329            |

|                                                               | COVID-19<br>n = 159 | Controls<br>n = 29 | P-value          | Myocarditis                 |                          |                          |                             | P-value*         |
|---------------------------------------------------------------|---------------------|--------------------|------------------|-----------------------------|--------------------------|--------------------------|-----------------------------|------------------|
|                                                               |                     |                    |                  | Not present<br>n = 17 (11%) | Unlikely<br>n = 56 (35%) | Probable<br>n = 65 (41%) | Very likely<br>n = 21 (13%) |                  |
| Ischemic distribution, n (%)                                  | 8 (5.5)             | 0 (0.0)            | 0.658            | 0 (0.0)                     | 2 (3.9)                  | 5 (8.1)                  | 1 (5.6)                     | 0.769            |
| <b>Non-ischemic distribution, n (%)</b>                       | 24 (16.3)           | 2 (8.0)            | 0.606            | 4 (28.6)                    | 5 (9.8)                  | 8 (12.9)                 | 7 (35.0)                    | <b>0.033</b>     |
| Pericardial thickening, n (%)                                 | 33 (21.2)           | 0 (0.0)            | 0.176            | 1 (5.9)                     | 10 (18.5)                | 15 (23.4)                | 7 (33.3)                    | 0.197            |
| Pericardial effusion, n (%)                                   | 16 (10.2)           | 0 (0.0)            | 0.135            | 0 (0.0)                     | 5 (9.1)                  | 7 (10.9)                 | 4 (19.0)                    | 0.297            |
| Right atrial area, mean (SD), cm <sup>2</sup>                 | 18.7 (4.7)          | 19.5 (4.2)         | 0.369            | 19.2 (3.9)                  | 18.8 (4.9)               | 18.1 (5.1)               | 19.9 (3.2)                  | 0.202            |
| Left atrial area, mean (SD), cm <sup>2</sup>                  | 20.7 (4.7)          | 21.8 (4.7)         | 0.210            | 22.3 (5.0)                  | 19.9 (4.2)               | 20.5 (5.1)               | 21.9 (4.1)                  | 0.204            |
| <i>Myocardial inflammation (Lake Louise criteria), n (%)</i>  |                     |                    |                  |                             |                          |                          |                             |                  |
| <b>Probable (1/2)</b>                                         | 74 (46.8)           | 1 (3.4)            | <b>&lt;0.001</b> | 4 (25.0)                    | 49 (87.5)                | 21 (32.3)                | 0 (0.0)                     | <b>&lt;0.001</b> |
| <b>Definite (2/2)</b>                                         | 67 (42.4)           | 1 (3.4)            | <b>&lt;0.001</b> | 0 (0)                       | 2 (3.6)                  | 44 (67.7)                | 21 (100.0)                  | <b>&lt;0.001</b> |
| <i>Renal MRI, mean (SD)</i>                                   |                     |                    |                  |                             |                          |                          |                             |                  |
| Average volume of right and left kidneys, ml                  | 153 (31)            | 156 (33)           | 0.761            | 158 (37)                    | 154 (25)                 | 150 (33)                 | 153 (38)                    | 0.656            |
| Average cortex T1 of right and left kidneys, ms               | 1544 (62)           | 1519 (70)          | 0.118            | 1548 (66)                   | 1535 (58)                | 1541 (63)                | 1585 (60)                   | 0.110            |
| <b>Average medulla T1 of right and left kidneys, ms</b>       | 1934 (69)           | 1953 (59)          | 0.161            | 1935 (66)                   | 1924 (65)                | 1925 (66)                | 2008 (57)                   | <b>0.003</b>     |
| <b>Average T1 corticomedullary differentiation of kidneys</b> | 0.80 (0.03)         | 0.78 (0.03)        | <b>&lt;0.001</b> | 0.80 (0.03)                 | 0.79 (0.03)              | 0.80 (0.03)              | 0.79 (0.02)                 | 0.535            |
| <i>Biomarkers at enrolment, central laboratory</i>            |                     |                    |                  |                             |                          |                          |                             |                  |
| <b>eGFR, median [IQR], ml/min/1.73m<sup>2</sup></b>           | 96 (85, 106)        | 89 (70, 98)        | <b>0.025</b>     | 95 (88, 103)                | 94 (84, 107)             | 97 (83, 105)             | 98 (94, 104)                | 0.931            |
| eGFR <60 ml/min/1.73m <sup>2</sup> , n (%)                    | 7 (4.7)             | 1 (4.8)            | 1.000            | 1 (6.2)                     | 1 (1.9)                  | 4 (6.6)                  | 1 (5.3)                     | 0.523            |
| <b>C-reactive protein, median [IQR], mg/L</b>                 | 5.5 (1.6, 22.3)     | 1.5 (0.8, 3.5)     | <b>&lt;0.001</b> | 6.0 (1.6, 18.2)             | 5.5 (1.4, 22.8)          | 4.9 (1.8, 21.6)          | 14.0 (0.9, 21.5)            | 0.971            |
| <b>Peak CRP category</b>                                      |                     |                    |                  |                             |                          |                          |                             |                  |
| <b>&lt;5.0 mg/l</b>                                           | 75 (48.4%)          | 24 (88.9%)         | <b>&lt;0.001</b> | 7 (41.2%)                   | 27 (49.1%)               | 33 (52.4%)               | 8 (40.0%)                   | 0.591            |
| <b>≥5.0, &lt;10.0 mg/l</b>                                    | 20 (12.9%)          | 2 (7.4%)           |                  | 4 (23.5%)                   | 8 (14.5%)                | 7 (11.1%)                | 1 (5.0%)                    |                  |
| <b>≥10.0 mg/l</b>                                             | 60 (38.7%)          | 1 (3.7%)           |                  | 6 (35.3%)                   | 20 (36.4%)               | 23 (36.5%)               | 11 (55.0%)                  |                  |

|                                                                    | COVID-19<br>n = 159 | Controls<br>n = 29 | P-value          | Myocarditis                 |                          |                          |                             | P-value*     |
|--------------------------------------------------------------------|---------------------|--------------------|------------------|-----------------------------|--------------------------|--------------------------|-----------------------------|--------------|
|                                                                    |                     |                    |                  | Not present<br>n = 17 (11%) | Unlikely<br>n = 56 (35%) | Probable<br>n = 65 (41%) | Very likely<br>n = 21 (13%) |              |
| High sensitivity troponin I, median [IQR], ng/L                    | 3 (2, 6)            | 4 (4, 6)           | 0.059            | 4 (3, 5)                    | 3 (2, 7)                 | 3 (2, 5)                 | 4 (3, 7)                    | 0.609        |
| <b>NT-proBNP, median [IQR], pg/mL</b>                              | 114 (57, 262)       | 58 (38, 99)        | <b>0.004</b>     | 108 (57, 246)               | 116 (65, 258)            | 93 (49, 278)             | 139 (65, 274)               | 0.546        |
| <b>Ferritin, median [IQR], µg/L</b>                                | 366 (202, 675)      | 186 (96, 254)      | <b>&lt;0.001</b> | 428 (143, 576)              | 398 (281, 658)           | 313 (172, 683)           | 379 (187, 637)              | 0.529        |
| <b>Haptoglobin, median [IQR], g/L</b>                              | 2.1 (1.3, 3.1)      | 1.5 (1.2, 1.8)     | <b>0.001</b>     | 2.2 (1.8, 3.2)              | 2.0 (1.5, 2.8)           | 1.9 (1.2, 3.1)           | 2.6 (1.6, 3.2)              | 0.738        |
| Total cholesterol, mean (SD), mmol/L                               | 4.8 (1.4)           | 4.9 (1.0)          | 0.530            | 4.8 (1.4)                   | 4.6 (1.3)                | 5.0 (1.5)                | 5.0 (1.1)                   | 0.384        |
| <b>Triglycerides, mean (SD), mmol/L</b>                            | 2.3 (1.3)           | 1.8 (1.3)          | <b>0.016</b>     | 2.3 (1.3)                   | 2.4 (1.4)                | 2.2 (1.2)                | 2.1 (0.8)                   | 0.868        |
| <b>HDL cholesterol, mean (SD), mmol/L</b>                          | 1.1 (0.3)           | 1.2 (0.3)          | <b>0.014</b>     | 1.0 (0.3)                   | 1.0 (0.3)                | 1.1 (0.4)                | 1.1 (0.4)                   | 0.432        |
| <b>Prothrombin time, mean (SD), s</b>                              | 12.1 (3.7)          | 11.2 (0.8)         | 0.106            | 12.1 (2.0)                  | 12.7 (5.5)               | 11.7 (2.4)               | 12.0 (1.5)                  | <b>0.042</b> |
| <b>D-Dimer, mean (SD), ng/mL</b>                                   | 259 (221)           | 152 (149)          | <b>&lt;0.001</b> | 290 (195)                   | 263 (178)                | 246 (168)                | 260 (192)                   | 0.374        |
| <b>Fibrinogen, mean (SD), g/L</b>                                  | 4.1 (1.7)           | 3.2 (1.1)          | <b>0.006</b>     | 3.9 (1.5)                   | 4.1 (1.7)                | 4.0 (1.6)                | 4.5 (1.9)                   | 0.659        |
| <b>Factor VIII, mean (SD), IU/dL</b>                               | 184 (94)            | 99 (39)            | <b>&lt;0.001</b> | 208 (88)                    | 183 (97)                 | 181 (99)                 | 173 (73)                    | 0.527        |
| Antithrombin, mean (SD), IU/dL                                     | 111 (18)            | 108 (14)           | 0.570            | 108 (18)                    | 112 (18)                 | 112 (17)                 | 109 (20)                    | 0.687        |
| Protein C, mean (SD), IU/dL                                        | 123 (30)            | 116 (21)           | 0.194            | 121 (30)                    | 120 (30)                 | 127 (32)                 | 123 (21)                    | 0.574        |
| Protein S, mean (SD), IU/dL                                        | 85 (28)             | 96 (26)            | 0.116            | 94 (33)                     | 87 (32)                  | 85 (25)                  | 75 (23)                     | 0.252        |
| <b>VWF:GP1bR, mean (SD), IU/dL</b>                                 | 236 (127)           | 137 (70)           | <b>&lt;0.001</b> | 257 (176)                   | 241 (118)                | 224 (123)                | 246 (122)                   | 0.755        |
| <b>VWF:Ag, mean (SD), IU/dL</b>                                    | 243 (145)           | 204 (251)          | <b>0.002</b>     | 310 (235)                   | 233 (118)                | 228(135)                 | 261 (140)                   | 0.380        |
| <i>Biomarkers at 28-60 days post-discharge, central laboratory</i> |                     |                    |                  |                             |                          |                          |                             |              |
| <b>eGFR, median [IQR], ml/min/1.73m<sup>2</sup></b>                | 95 (83, 106)        | 88 (70, 98)        | <b>0.047</b>     | 91 (79, 103)                | 95 (82, 106)             | 95 (87, 105)             | 98 (79, 105)                | 0.954        |
| eGFR <60 ml/min/1.73m <sup>2</sup> , n (%)                         | 7 (4.7)             | 1 (4.8)            | 1.000            | 1 (6.7)                     | 1 (1.9)                  | 4 (6.5)                  | 1 (5.3)                     | 0.514        |
| C-reactive protein, median [IQR], mg/L                             | 1.9 (0.9, 3.5)      | 1.5 (0.8, 3.5)     | 0.572            | 1.7 (1.1, 3.5)              | 2.0 (1.2, 3.4)           | 1.8 (0.8, 4.4)           | 1.9 (0.9, 3.1)              | 0.996        |
| <b>Peak CRP category</b>                                           |                     |                    |                  |                             |                          |                          |                             |              |
| <b>&lt;5.0 mg/l</b>                                                | 124 (81.0%)         | 24 (88.9%)         | 0.770            | 14 (87.5%)                  | 45 (81.8%)               | 2 (3.6%)                 | 16 (80.0%)                  | 0.562        |
| <b>≥5.0, &lt;10.0 mg/l</b>                                         | 16 (10.5%)          | 2 (7.4%)           |                  | 1 (6.2%)                    | 8 (14.5%)                | 6 (9.7%)                 | 1 (5.0%)                    |              |



|                                                                   | COVID-19<br>n = 159 | Controls<br>n = 29 | P-value          | Myocarditis                 |                          |                          |                             | P-value* |
|-------------------------------------------------------------------|---------------------|--------------------|------------------|-----------------------------|--------------------------|--------------------------|-----------------------------|----------|
|                                                                   |                     |                    |                  | Not present<br>n = 17 (11%) | Unlikely<br>n = 56 (35%) | Probable<br>n = 65 (41%) | Very likely<br>n = 21 (13%) |          |
| <b>≥10.0 mg/l</b>                                                 | 13 (8.5%)           | 1 (3.7%)           |                  | 1 (6.2%)                    | 2 (3.6%)                 | 7 (11.3%)                | 3 (15.0%)                   |          |
| <b>High sensitivity troponin I, median [IQR], ng/L</b>            | 2 (1, 4)            | 4 (4, 6)           | <b>&lt;0.001</b> | 2 (2, 4)                    | 2 (1, 5)                 | 2 (1, 4)                 | 2 (1, 4)                    | 0.941    |
| <b>NT-proBNP, median [IQR], pg/mL</b>                             | 83 (54, 198)        | 58 (38, 99)        | <b>0.022</b>     | 60 (30, 172)                | 112 (65, 207)            | 87 (56, 148)             | 75 (52, 213)                | 0.290    |
| Ferritin, median [IQR], ug/L                                      | 144 (72, 282)       | 186 (96, 254)      | 0.529            | 145 (86, 299)               | 158 (94, 296)            | 129 (57, 206)            | 157 (99, 319)               | 0.360    |
| <b>Haptoglobin, median [IQR], g/L</b>                             | 1.3 (0.9, 1.6)      | 1.5 (1.2, 1.8)     | <b>0.031</b>     | 1.4 (1.1, 1.6)              | 1.2 (0.8, 1.6)           | 1.3 (0.8, 1.6)           | 1.3 (0.9, 1.8)              | 0.709    |
| D-Dimer, mean (SD), ng/mL                                         | 205 (252)           | 152 (149)          | 0.146            | 171 (111)                   | 207 (200)                | 194 (193)                | 266 (517)                   | 0.965    |
| Fibrinogen, mean (SD), g/L                                        | 3.4(1.4)            | 3.2 (1.1)          | 0.439            | 3.6 (2.4)                   | 3.2 (0.9)                | 3.5 (1.3)                | 3.8 (1.7)                   | 0.468    |
| <b>Factor VIII, mean (SD), IU/dL</b>                              | 149 (65)            | 108 (58)           | <b>&lt;0.001</b> | 151 (96)                    | 141 (54)                 | 151 (70)                 | 160 (50)                    | 0.606    |
| Protein S, mean (SD), IU/dL                                       | 100 (22)            | 100 (26)           | 0.260            | 107 (21)                    | 105 (21)                 | 96 (22)                  | 92 (17)                     | 0.062    |
| VWF:GP1bR, mean (SD), IU/dL                                       | 143 (80)            | 137 (70)           | 0.912            | 138 (104)                   | 136 (76)                 | 144 (79)                 | 165 (77)                    | 0.345    |
| VWF:Ag, mean (SD), IU/dL                                          | 164 (97)            | 204 (251)          | 0.479            | 151 (79)                    | 155 (85)                 | 157 (88)                 | 224 (144)                   | 0.091    |
| <i>Urine Biomarkers</i>                                           |                     |                    |                  |                             |                          |                          |                             |          |
| Albumin: creatinine ratio at enrolment, mean (SD)                 | 3.2 (8.0)           | 6.2 (26.9)         | 0.173            | 1.6 (3.1)                   | 4.5 (12.0)               | 2.3 (4.3)                | 4.1 (6.5)                   | 0.758    |
| Albumin: creatinine ratio at 28-60 days post-discharge, mean (SD) | 3.8 (10.9)          | 6.2 (26.9)         | 0.257            | 5.1 (13.4)                  | 5.1 (15.2)               | 3.4 (5.4)                | 3.8 (6.4)                   | 0.900    |

781 Table S2: Missing data in post-COVID-19 patients (admission, enrolment, 28-60 days) and controls – myopericarditis criteria – n=9, n=12, n=16, n=0; Missing data in post-  
782 COVID-19 patients at 28-60 days and controls – CT chest atelectasis, reticulation, ground glass – n=2, n=5; pulmonary arterial thrombus – n=8, n=6; CT coronary angiogram  
783 28-60 days and controls: Agatston score – n=7, n=4; CAD-RADS score – n=5, n=4; FFR<sub>CT</sub> – n=27, n=4; Cardiovascular magnetic resonance imaging 28-60 days post-discharge:  
784 left ventricular end-diastolic volume index, left ventricular end-systolic volume index, left ventricular ejection fraction, left ventricular strain – n=2, n=3; left ventricular mass  
785 – n=2, n=3; right ventricular end-diastolic volume index, right ventricular systolic volume index, n=4, n=3; right ventricular ejection fraction, n=3, n=3; global T1 – n=1, n=3;  
786 global T2 – n=1, n=3; global extracellular volume – n=16, n=5; late gadolinium enhancement – n=1, n=3; ischemic distribution – n=14, n=4; non-ischemic distribution – n=12,  
787 n=4; mixed distribution – n=14, n=4; pericardial thickening – n=3, n=3; pericardial effusion – n=2, n=3; right and left atrial area – n=1, n=3; myocardial inflammation – n=1,  
788 n=0. Missing data in blood biomarkers, post-COVID-19 patients (enrolment and 28-60 days) and controls – eGFR – n=9, n=10, n= 8; C-reactive protein – n=4, n=6, n=2; High  
789 sensitivity troponin I – n=6, n=8, n=2; NT-proBNP – n=6, n=10, n=2; Total cholesterol, triglycerides, HDL cholesterol – n=4, n=6, n=2; Fibrinogen – n=5, n=10, n=2; D-Dimer  
790 – n=5, n=9, n=2; Factor VIII – n=5, n=9, n=2; Antithrombin – n=5, n=10, n=3; Protein C – n=5, n=10, n=3; Protein S – n=3, n=11, n=3; VWF:GP1bR – n=6, n=9, n=2;  
791 VWF:Ag – n=5, n=9, n=2. Abbreviations – aPTT - activated partial thromboplastin time; CAD-RADS - Coronary Artery Disease - Reporting and Data System; ECV -  
792 extracellular volume; eGFR (CKD-EPI) – estimated glomerular filtration rate using the Chronic Kidney Disease Epidemiology (CKD-EPI) equation)<sup>6</sup>; EF – ejection fraction;  
793 EDV – end-diastolic volume; ESV – end-systolic volume; FFR<sub>CT</sub> – fractional flow reserve computed tomography; HbA1c - hemoglobin A1c; HDL – high density lipoprotein;  
794 LV – left ventricle; MESA - Multi-ethnic study of atherosclerosis; NT-proBNP - N-terminal pro B-type natriuretic peptide; PT – prothrombin time; RV - right ventricle; T1 –

795 longitudinal relaxation time; T2 – transverse relaxation time; TCT - thrombin clotting time; vWF:Ag - von Willebrand factor antigen.  
796 \* Categorical data are summarized as frequency and percentage and compared between groups using Fisher's Exact tests. Continuous data are summarized as mean and standard  
797 deviation, or median and interquartile range (IQR, defined as the upper and lower quartiles), and compared between groups using Kruskal-Wallis tests. All p-values are two-  
798 sided. No adjustments were made for multiple comparisons. The Kendall's tau rank correlation between Lake Louise criteria, and the final adjudication (4 levels) was 0.75, or  
799 with 2 levels, was 0.72, representing moderately strong correlations.

800 **Table S3. SARS-CoV-2 vaccination status.**

|                                             | COVID-19                |                      | Controls  |
|---------------------------------------------|-------------------------|----------------------|-----------|
|                                             | Without Primary Outcome | With Primary outcome |           |
|                                             | (n = 104)               | (n = 159)            | (n = 29)  |
| <i>SARS-CoV-2 vaccination status, n (%)</i> |                         |                      |           |
| First dose prior to admission               | 1 (1.0)                 | 2 (1.3)              | -         |
| Second dose prior to admission              | 0 (0.0)                 | 0 (0.0)              | -         |
| First dose prior to imaging                 | -                       | 11 (6.9)             | 23 (79.3) |
| Second dose prior to imaging                | -                       | 0 (0.0)              | 15 (51.7) |
| Third dose prior to imaging                 | -                       | 0 (0.0)              | 0 (0.0)   |

801 Table S3 shows numbers and percentages. SARS-CoV-2 vaccines used in the NHS Scotland vaccination  
802 programme are the messenger RNA vaccines, BNT162b2 and mRNA-1273 manufactured by Biotech GmbH  
803 (Mainz, Germany) and Moderna (Cambridge, MA), respectively, and the AZD1222 (ChAdOx1 nCoV-19)  
804 recombinant SARS-CoV-2 vaccine manufactured by AstraZeneca (Cambridge, UK).

805 **Table S4. Primary and secondary outcomes.**

|                                                                          | Myocarditis        |                           |                        |                        |                           | P-value          |
|--------------------------------------------------------------------------|--------------------|---------------------------|------------------------|------------------------|---------------------------|------------------|
|                                                                          | All cases<br>n=159 | Not present<br>n=17 (11%) | Unlikely<br>n=56 (35%) | Probable<br>n=65 (41%) | Very likely<br>n=21 (13%) |                  |
| <i>Cause of myocardial inflammation (endotype)</i>                       |                    |                           |                        |                        |                           |                  |
| <i>SARS-COV-2 Myocarditis, n (%)</i>                                     |                    |                           |                        |                        |                           |                  |
| Not present                                                              | 16 (10.1)          | 16 (94.1)                 | 0 (0.0)                | 0 (0.0)                | 0 (0.0)                   | <b>&lt;0.001</b> |
| Unlikely                                                                 | 59 (37.1)          | 1 (5.9)                   | 56 (100.0)             | 2 (3.1)                | 0 (0.0)                   |                  |
| Probable                                                                 | 76 (47.8)          | 0 (0.0)                   | 0 (0.0)                | 62 (95.4)              | 14 (66.7)                 |                  |
| Very Likely                                                              | 8 (5.0)            | 0 (0.0)                   | 0 (0.0)                | 1 (1.5)                | 7 (33.3)                  |                  |
| <i>Acute Stress Cardiomyopathy, n (%)</i>                                |                    |                           |                        |                        |                           |                  |
| Not present                                                              | 89 (56.0)          | 15 (88.2)                 | 37 (66.1)              | 26 (40.0)              | 11 (52.4)                 | <b>&lt;0.001</b> |
| Unlikely                                                                 | 69 (43.4)          | 1 (5.9)                   | 19 (33.9)              | 39 (60.0)              | 10 (47.6)                 |                  |
| Probable                                                                 | 1 (0.6)            | 1 (5.9)                   | 0 (0.0)                | 0 (0.0)                | 0 (0.0)                   |                  |
| Very Likely                                                              | 0 (0.0)            | 0 (0.0)                   | 0 (0.0)                | 0 (0.0)                | 0 (0.0)                   |                  |
| <i>Ischemia/ Impaired Perfusion as a Stressor of Inflammation, n (%)</i> |                    |                           |                        |                        |                           |                  |
| Not present                                                              | 75 (47.2)          | 14 (82.4)                 | 35 (62.5)              | 21 (32.3)              | 5 (23.8)                  | <b>&lt;0.001</b> |
| Unlikely                                                                 | 73 (45.9)          | 2 (11.8)                  | 17 (30.4)              | 39 (60.0)              | 15 (71.4)                 |                  |
| Probable                                                                 | 9 (5.7)            | 0 (0.0)                   | 3 (5.4)                | 5 (7.7)                | 1 (4.8)                   |                  |
| Very Likely                                                              | 2 (1.3)            | 1 (5.9)                   | 1 (1.8)                | 0 (0.0)                | 0 (0.0)                   |                  |
| <i>Infective Myopericarditis (non-Covid infection), n (%)</i>            |                    |                           |                        |                        |                           |                  |
| Not present                                                              | 42 (26.4)          | 17 (100.0)                | 12 (21.4)              | 11 (16.9)              | 2 (9.5)                   | <b>&lt;0.001</b> |
| Unlikely                                                                 | 117 (73.6)         | 0 (0.0)                   | 44 (78.6)              | 54 (83.1)              | 19 (90.5)                 |                  |
| Probable                                                                 | 0 (0.0)            | 0 (0.0)                   | 0 (0.0)                | 0 (0.0)                | 0 (0.0)                   |                  |
| Very Likely                                                              | 0 (0.0)            | 0 (0.0)                   | 0 (0.0)                | 0 (0.0)                | 0 (0.0)                   |                  |

|                                                                     | Myocarditis        |                           |                        |                        |                           | P-value          |
|---------------------------------------------------------------------|--------------------|---------------------------|------------------------|------------------------|---------------------------|------------------|
|                                                                     | All cases<br>n=159 | Not present<br>n=17 (11%) | Unlikely<br>n=56 (35%) | Probable<br>n=65 (41%) | Very likely<br>n=21 (13%) |                  |
| <i>Drug Induced (Toxic) Myocardial Inflammation, n (%)</i>          |                    |                           |                        |                        |                           |                  |
| Not present                                                         | 71 (44.7)          | 17 (100.0)                | 29 (51.8)              | 20 (30.8)              | 5 (23.8)                  | <b>&lt;0.001</b> |
| Unlikely                                                            | 88 (55.3)          | 0 (0.0)                   | 27 (48.2)              | 45 (69.2)              | 16 (76.2)                 |                  |
| Probable                                                            | 0 (0.0)            | 0 (0.0)                   | 0 (0.0)                | 0 (0.0)                | 0 (0.0)                   |                  |
| Very Likely                                                         | 0 (0.0)            | 0 (0.0)                   | 0 (0.0)                | 0 (0.0)                | 0 (0.0)                   |                  |
| <i>Idiopathic Myocardial and/or Pericardial Inflammation, n (%)</i> |                    |                           |                        |                        |                           |                  |
| Not present                                                         | 29 (18.2)          | 17 (100.0)                | 6 (10.7)               | 4 (6.2)                | 2 (9.5)                   | <b>&lt;0.001</b> |
| Unlikely                                                            | 130 (81.8)         | 0 (0.0)                   | 50 (89.3)              | 61 (93.8)              | 19 (90.5)                 |                  |
| Probable                                                            | 0 (0.0)            | 0 (0.0)                   | 0 (0.0)                | 0 (0.0)                | 0 (0.0)                   |                  |
| Very Likely                                                         | 0 (0.0)            | 0 (0.0)                   | 0 (0.0)                | 0 (0.0)                | 0 (0.0)                   |                  |

806 Table S4 shows numbers and percentages, with p-values from Fisher's Exact tests. All p-values are two-sided. No adjustments were made for multiple comparisons. The exact  
807 p-values are : SARS-COV-2 Myocarditis, p=0.0001; Acute Stress Cardiomyopathy, p=0.0001; Ischemia/ Impaired Perfusion as a Stressor of Inflammation, p=0.0001; Infective  
808 Myopericarditis (non-Covid infection), p=0.0001; Drug Induced (Toxic) Myocardial Inflammation, p=0.0001; Idiopathic Myocardial and/or Pericardial Inflammation,  
809 p=0.0001.

810 **Table S5. Diagnoses given by all raters in relation to the adjudicated diagnosis.**

|                                                                       |             | All COVID-19<br>(n=795) | Adjudicated Myocarditis Diagnosis |                     |                     |                        | p-value           |
|-----------------------------------------------------------------------|-------------|-------------------------|-----------------------------------|---------------------|---------------------|------------------------|-------------------|
|                                                                       |             |                         | Not present<br>(n=85)             | Unlikely<br>(n=280) | Probable<br>(n=335) | Very likely<br>(n=105) |                   |
| Individual rater<br>assessment of the<br>likelihood of<br>myocarditis | Not Present | 111 (14.0%)             | 74 (87.1%)                        | 36 (12.9%)          | 1 (0.3%)            | 0 (0.0%)               | <b>P&lt;0.001</b> |
|                                                                       | Unlikely    | 223 (28.1%)             | 9 (10.6%)                         | 171 (61.1%)         | 41 (12.6%)          | 2 (1.9%)               |                   |
|                                                                       | Probable    | 314 (39.5%)             | 2 (2.4%)                          | 68 (24.3%)          | 214 (65.8%)         | 30 (28.6%)             |                   |
|                                                                       | Very Likely | 147 (18.5%)             | 0 (0.0%)                          | 5 (1.8%)            | 69 (21.2%)          | 73 (69.5%)             |                   |

811 Table S5 shows numbers and percentages, with p-value from Fisher's Exact tests (two-sided). The denominators at the top of the table are five times the numbers of patients  
812 with each adjudicated diagnosis. E.g. with 21 patients adjudicated as being highly likely to have myocarditis, there were 105 individual assessment of this likelihood for these  
813 patients. The data illustrate a high level of concordance between the raters for myocarditis not present, and good discrimination between probably and very likely.

814 **Table S6. Clinical and Diagnostic criteria for myocarditis, split by adjudicated likelihood of myocarditis diagnosis.**

|                                              | COVID-19<br>n=159 | Adjudicated Myocarditis Diagnosis |                  |                  |                     | p-value          |
|----------------------------------------------|-------------------|-----------------------------------|------------------|------------------|---------------------|------------------|
|                                              |                   | Not present<br>n=17               | Unlikely<br>n=56 | Probable<br>n=65 | Very likely<br>n=21 |                  |
| <i>Clinical criteria</i>                     |                   |                                   |                  |                  |                     |                  |
| Chest pain                                   | 38 (23.9%)        | 7 (41.2%)                         | 10 (17.9%)       | 13 (20.0%)       | 8 (38.1%)           | 0.081            |
| New symptoms of breathlessness               | 149 (93.7%)       | 17 (100.0%)                       | 51 (91.1%)       | 61 (93.8%)       | 20 (95.2%)          | 0.804            |
| Chronic symptoms of breathlessness           | 2 (1.3%)          | 0 (0.0%)                          | 1 (1.8%)         | 1 (1.5%)         | 0 (0.0%)            | 1.000            |
| Cardiogenic shock                            | 2 (1.3%)          | 1 (5.9%)                          | 0 (0.0%)         | 1 (1.5%)         | 0 (0.0%)            | 0.220            |
| Palpitations / Syncope / Arrhythmia          | 14 (8.8%)         | 1 (5.9%)                          | 4 (7.1%)         | 7 (10.8%)        | 2 (9.5%)            | 0.905            |
| Number of clinical criteria                  | 0                 | 7 (4.4%)                          | 0 (0.0%)         | 4 (7.1%)         | 3 (4.6%)            | 0 (0.0%)         |
|                                              | 1                 | 104 (65.4%)                       | 8 (47.1%)        | 40 (71.4%)       | 44 (67.7%)          | 12 (57.1%)       |
|                                              | 2                 | 44 (27.7%)                        | 9 (52.9%)        | 10 (17.9%)       | 16 (24.6%)          | 9 (42.9%)        |
|                                              | 3                 | 3 (1.9%)                          | 0 (0.0%)         | 2 (3.6%)         | 1 (1.5%)            | 0 (0.0%)         |
|                                              | 4                 | 1 (0.6%)                          | 0 (0.0%)         | 0 (0.0%)         | 1 (1.5%)            | 0 (0.0%)         |
| <i>Diagnostic criteria</i>                   |                   |                                   |                  |                  |                     |                  |
| ECG Myocarditis                              | 30 (18.9%)        | 3 (17.6%)                         | 9 (16.1%)        | 12 (18.5%)       | 6 (28.6%)           | 0.651            |
| <b>T2 Criteria</b>                           | 89 (56.0%)        | 0 (0.0%)                          | 16 (28.6%)       | 52 (80.0%)       | 21 (100.0%)         | <b>&lt;0.001</b> |
| <b>T1 Criteria</b>                           | 114 (71.7%)       | 0 (0.0%)                          | 36 (64.3%)       | 57 (87.7%)       | 21 (100.0%)         | <b>&lt;0.001</b> |
| <b>Lake Louise Criteria</b>                  | <b>1 of 2</b>     | 73 (45.9%)                        | 0 (0.0%)         | 52 (92.9%)       | 21 (32.3%)          | 0 (0.0%)         |
|                                              | <b>2 of 2</b>     | 65 (40.9%)                        | 0 (0.0%)         | 0 (0.0%)         | 44 (67.7%)          | 21 (100.0%)      |
| Elevated high sensitivity troponin           | 77 (48.4%)        | 6 (35.3%)                         | 26 (46.4%)       | 31 (47.7%)       | 14 (66.7%)          | 0.267            |
| <b>Global left ventricular dysfunction</b>   | 32 (20.1%)        | 3 (17.6%)                         | 6 (10.7%)        | 14 (21.5%)       | 9 (42.9%)           | <b>0.022</b>     |
| <b>Regional left ventricular dysfunction</b> | 34 (21.4%)        | 3 (17.6%)                         | 5 (8.9%)         | 17 (26.2%)       | 9 (42.9%)           | <b>0.006</b>     |

|                                         |            |            |            |            |            |           |                  |
|-----------------------------------------|------------|------------|------------|------------|------------|-----------|------------------|
| <b>Pericardial changes</b>              |            | 32 (20.1%) | 0 (0.0%)   | 10 (17.9%) | 15 (23.1%) | 7 (33.3%) | <b>0.046</b>     |
| <b>New left ventricular dysfunction</b> |            | 29 (18.2%) | 2 (11.8%)  | 5 (8.9%)   | 14 (21.5%) | 8 (38.1%) | <b>0.022</b>     |
|                                         | <b>0</b>   | 10 (6.8%)  | 10 (58.8%) | 0 (0.0%)   | 0 (0.0%)   | 0 (0.0%)  |                  |
|                                         | <b>1-2</b> | 28 (19.0%) | 4 (23.5%)  | 20 (35.7%) | 4 (6.7%)   | 0 (0.0%)  |                  |
| <b>Number of diagnostic criteria</b>    | <b>3-4</b> | 62 (42.2%) | 3 (17.6%)  | 32 (57.1%) | 24 (40.0%) | 3 (21.4%) | <b>&lt;0.001</b> |
|                                         | <b>5-6</b> | 37 (25.2%) | 0 (0.0%)   | 3 (5.4%)   | 26 (43.3%) | 8 (57.1%) |                  |
|                                         | <b>7+</b>  | 10 (6.8%)  | 0 (0.0%)   | 1 (1.8%)   | 6 (10.0%)  | 3 (21.4%) |                  |

815 Table S6 shows numbers and percentages, with p-values from Fisher's Exact tests. All p-values are two-sided. No adjustments were made for multiple comparisons.



816 **Table S7. Serious adverse events occurring during the index admission.**

|                                          | COVID-19 population                  |                                   | Fisher Test<br>p-value |
|------------------------------------------|--------------------------------------|-----------------------------------|------------------------|
|                                          | Without Primary Outcome<br>(n = 104) | With Primary outcome<br>(n = 159) |                        |
| <i>Index admission, n (%)</i>            |                                      |                                   |                        |
| Death                                    | 1 (1.0)                              | 0 (0.0)                           | 0.40                   |
| Myocardial infarction                    | 1 (1.0)                              | 7 (4.4)                           | 0.16                   |
| Stroke                                   | 1 (1.0)                              | 0 (0.0)                           | 0.40                   |
| Heart failure                            | 2 (1.9)                              | 1 (0.6)                           | 0.57                   |
| Pulmonary embolism                       | 5 (4.8)                              | 5 (3.1)                           | 0.53                   |
| Deep vein thrombosis                     | 0 (0.0)                              | 1 (0.6)                           | 1.00                   |
| Atrial fibrillation                      | 6 (5.8)                              | 5 (3.1)                           | 0.36                   |
| Ventricular arrhythmia                   | 0 (0.0)                              | 0 (0.0)                           | -                      |
| Non-cardiovascular serious adverse event | 0 (0.0)                              | 0 (0.0)                           | -                      |

817 Table S7 shows numbers and percentages, with p-values from Fisher's Exact tests. All p-values are two-sided. No adjustments were made for multiple comparisons.

818 **Table S8. Clinical outcomes in the primary analysis population.**

|                                             | With Primary Outcome<br>n = 159 | Control<br>n = 27* | p-value <sup>(a)</sup> | Myocarditis                 |                          |                          |                             | p-value <sup>(b)</sup> |
|---------------------------------------------|---------------------------------|--------------------|------------------------|-----------------------------|--------------------------|--------------------------|-----------------------------|------------------------|
|                                             |                                 |                    |                        | Not present<br>n = 17 (11%) | Unlikely<br>n = 56 (35%) | Probable<br>n = 65 (41%) | Very likely<br>n = 21 (13%) |                        |
| <i>Duration of follow-up</i>                |                                 |                    |                        |                             |                          |                          |                             |                        |
| Days to Visit 3 or death, (median IQR)      | 419 (369, 451)                  | 218 (208, 236)     | <0.001                 | 429 (416, 545)              | 414 (369, 437)           | 417 (369, 444)           | 454 (365, 546)              | 0.185                  |
| <i>Outcomes, n (%)</i>                      |                                 |                    |                        |                             |                          |                          |                             |                        |
| <b>Death or Hospitalization (Any Cause)</b> | 24 (15.1)                       | 2 (7.4)            | 0.356                  | 3 (17.6)                    | 10 (17.9)                | 9 (13.8)                 | 2 (9.5)                     | 0.845                  |
| Death (Any Cause)                           | 2 (1.3)                         | 0 (0.0)            | 0.663                  | 0 (0.0)                     | 0 (0.0)                  | 2 (3.1)                  | 0 (0.0)                     | 0.413                  |
| Cardiovascular Death                        | 1 (0.6)                         | 0 (0.0)            | 0.888                  | 0 (0.0)                     | 0 (0.0)                  | 1 (1.5)                  | 0 (0.0)                     | 0.701                  |
| Renal Death                                 | 0 (0.0)                         | 0 (0.0)            | -                      | 0 (0.0)                     | 0 (0.0)                  | 0 (0.0)                  | 0 (0.0)                     | -                      |
| Respiratory Death                           | 0 (0.0)                         | 0 (0.0)            | -                      | 0 (0.0)                     | 0 (0.0)                  | 0 (0.0)                  | 0 (0.0)                     | -                      |
| <b>Hospitalization (Any Cause)</b>          | 24 (15.1)                       | 2 (7.4)            | 0.356                  | 3 (17.6)                    | 10 (17.9)                | 9 (13.8)                 | 2 (9.5)                     | 0.845                  |
| Cardiovascular Hospitalization              | 7 (4.4)                         | 2 (7.4)            | 0.340                  | 1 (5.9)                     | 5 (8.9)                  | 1 (1.5)                  | 0 (0.0)                     | 0.177                  |
| Renal Hospitalization                       | 2 (1.3)                         | 0 (0.0)            | 0.680                  | 1 (5.9)                     | 1 (1.8)                  | 0 (0.0)                  | 0 (0.0)                     | 0.526                  |
| Respiratory Hospitalization                 | 8 (5.0)                         | 0 (0.0)            | 0.242                  | 2 (11.8)                    | 2 (3.6)                  | 2 (3.1)                  | 2 (9.5)                     | 0.335                  |
| <i>Cardiovascular outcomes, n (%)</i>       |                                 |                    |                        |                             |                          |                          |                             |                        |
| <b>Myocardial infarction</b>                | 1 (0.6)                         | 0 (0.0)            | 0.679                  | 1 (5.9)                     | 0 (0.0)                  | 0 (0.0)                  | 0 (0.0)                     | 0.040                  |
| Percutaneous Coronary Intervention          | 3 (1.9)                         | 0 (0.0)            | 0.481                  | 1 (5.9)                     | 1 (1.8)                  | 0 (0.0)                  | 1 (4.8)                     | 0.300                  |
| Coronary Artery Bypass Grafting             | 0 (0.0)                         | 0 (0.0)            | -                      | 0 (0.0)                     | 0 (0.0)                  | 0 (0.0)                  | 0 (0.0)                     | -                      |
| <b>Cerebrovascular accident</b>             | 0 (0.0)                         | 1 (3.7)            | <b>0.016</b>           | 0 (0.0)                     | 0 (0.0)                  | 0 (0.0)                  | 0 (0.0)                     | -                      |
| Heart Failure                               | 2 (1.3)                         | 1 (3.7)            | 0.232                  | 0 (0.0)                     | 1 (1.8)                  | 1 (1.5)                  | 0 (0.0)                     | 0.886                  |
| Deep vein thrombosis                        | 0 (0.0)                         | 0 (0.0)            | -                      | 0 (0.0)                     | 0 (0.0)                  | 0 (0.0)                  | 0 (0.0)                     | -                      |
| New atrial fibrillation                     | 3 (1.9)                         | 1 (3.7)            | 0.204                  | 0 (0.0)                     | 1 (1.8)                  | 2 (3.1)                  | 0 (0.0)                     | 0.739                  |

|                                         |            |          |              |           |           |           |           |                  |
|-----------------------------------------|------------|----------|--------------|-----------|-----------|-----------|-----------|------------------|
| Ventricular tachycardia or fibrillation | 0 (0.0)    | 0 (0.0)  | -            | 0 (0.0)   | 0 (0.0)   | 0 (0.0)   | 0 (0.0)   | -                |
| <i>Respiratory outcomes, n (%)</i>      |            |          |              |           |           |           |           |                  |
| <b>Pulmonary fibrosis</b>               | 9 (5.7)    | 0 (0.0)  | 0.336        | 0 (0.0)   | 0 (0.0)   | 4 (6.2)   | 5 (23.8)  | <b>&lt;0.001</b> |
| New diagnosis asthma                    | 1 (0.6)    | 0 (0.0)  | 0.680        | 1 (5.9)   | 0 (0.0)   | 0 (0.0)   | 0 (0.0)   | 0.039            |
| Pulmonary embolism                      | 4 (2.5)    | 0 (0.0)  | 0.407        | 0 (0.0)   | 1 (1.8)   | 2 (3.1)   | 1 (4.8)   | 0.778            |
| Long-term oxygen therapy                | 2 (1.3)    | 0 (0.0)  | 0.559        | 0 (0.0)   | 0 (0.0)   | 1 (1.5)   | 1 (4.8)   | 0.391            |
| <i>Secondary care (outpatients)</i>     |            |          |              |           |           |           |           |                  |
| <b>Any outpatient care</b>              | 108 (67.9) | 7 (25.9) | <b>0.017</b> | 12 (70.6) | 35 (62.5) | 44 (67.7) | 17 (81.0) | 0.184            |
| Acute COVID-19 (<28 days)               | 15 (9.4)   | 0 (0.0)  | 0.102        | 2 (11.8)  | 3 (5.4)   | 9 (13.8)  | 1 (4.8)   | 0.340            |
| Ongoing COVID-19 (28-84 days)           | 20 (12.6)  | 1 (3.7)  | 0.194        | 1 (5.9)   | 5 (8.9)   | 9 (13.8)  | 5 (23.8)  | 0.225            |
| <b>Long COVID-19 (&gt;84 days)</b>      | 58 (36.5)  | 1 (3.7)  | <b>0.017</b> | 9 (52.9)  | 13 (23.2) | 27 (41.5) | 9 (42.9)  | 0.122            |
| Cardiology                              | 22 (13.8)  | 1 (3.7)  | 0.320        | 3 (17.6)  | 9 (16.1)  | 6 (9.2)   | 4 (19.0)  | 0.650            |
| <b>Respiratory</b>                      | 55 (34.6)  | 1 (3.7)  | <b>0.013</b> | 8 (47.1)  | 12 (21.4) | 27 (41.5) | 8 (38.1)  | 0.102            |
| Physiotherapy                           | 22 (13.8)  | 1 (3.7)  | 0.232        | 2 (11.8)  | 4 (7.1)   | 12 (18.5) | 4 (19.0)  | 0.264            |

819  
820  
821

Table S8: For clinical outcomes, data are the number and percentage of participants with at least one event during follow-up. P-values are from log rank tests of the time to first event. All p-values are two-sided. No adjustments were made for multiple comparisons. (a): COVID-19 patients with primary outcome vs. controls. (b): Comparing subgroups defined by likelihood of myocarditis. \*Two controls developed COVID-19 after the imaging visit, hence they were excluded from this group.

822 **Table S9. Deaths and adjudicated causes of death.**

| Participant ID | Date of consent | Date of death | Death during index hospitalisation, Y/N | Visit 2, Y/N | Myocarditis adjudicated very likely, Y/N | Acute kidney injury, Y/N | Adjudicated cause of death                                                                                     |
|----------------|-----------------|---------------|-----------------------------------------|--------------|------------------------------------------|--------------------------|----------------------------------------------------------------------------------------------------------------|
| 1074           | 21/09/2020      | 16/12/2020    | N                                       | Y            | N                                        | N                        | Urosepsis                                                                                                      |
| 1104           | 08/10/2020      | 02/11/2020    | N                                       | N            | N/A                                      | N                        | Metastatic prostate cancer                                                                                     |
| 1117           | 20/10/2020      | 15/08/2021    | N                                       | Y            | N                                        | N                        | Diffuse hypoxic brain injury secondary to out of hospital cardiac arrest and lower respiratory tract infection |
| 2025           | 23/10/2020      | 16/11/2020    | Y                                       | N            | N/A                                      | N                        | COVID-19 pneumonitis                                                                                           |

823 Table S9: The reporting period extends from the date of the first patient in (22 May 2020) to the last day of follow-up (13 December 2021). Participant details: Patient 1074 had chronic  
824 kidney disease stage 3B and the adjudicated likelihood of myocarditis for this patient was ‘probably’ (median score = 3; adjudicator scores: 2,3,3,3,3). The adjudicated likelihood of  
825 myocarditis for patient 1117 was ‘probably’ (median score = 3; adjudicator scores: 3,3,3,4,4).

**Table S10. Medication prescription at follow-up.**

|                                           | COVID-19<br>N=159 | Control<br>N=27* | p-value <sup>(a)</sup> | Myocarditis     |                  |                |                 | p-value <sup>(b)</sup> |
|-------------------------------------------|-------------------|------------------|------------------------|-----------------|------------------|----------------|-----------------|------------------------|
|                                           |                   |                  |                        | Not present     | Unlikely         | Probable       | Very likely     |                        |
|                                           |                   |                  |                        | n = 17 (11%)    | n = 56 (35%)     | n = 65 (41%)   | n = 21 (13%)    |                        |
| <i>Medication, n (%)</i>                  |                   |                  |                        |                 |                  |                |                 |                        |
| <b>Aspirin</b>                            | 22 (13.8%)        | 0 (0.0%)         | <b>0.048</b>           | 4 (23.5)        | 7 (12.5)         | 6 (9.2)        | 5 (23.8)        | 0.204                  |
| P2Y12 inhibitor                           | 8 (5.0%)          | 3 (11.1%)        | 0.202                  | 2 (11.8)        | 3 (5.4)          | 2 (3.1)        | 1 (4.8)         | 0.413                  |
| <b>Calcium channel blocker</b>            | 31 (19.5%)        | 6 (22.2%)        | 0.795                  | <b>6 (35.3)</b> | <b>13 (23.2)</b> | <b>6 (9.2)</b> | <b>6 (28.6)</b> | <b>0.021</b>           |
| Angiotensin converting enzyme inhibitor   | 37 (23.3%)        | 5 (18.5%)        | 0.804                  | 5 (29.4)        | 13 (23.2)        | 12 (18.5)      | 7 (33.3)        | 0.463                  |
| Angiotensin receptor blocker              | 15 (9.4%)         | 2 (7.4%)         | 1.000                  | 1 (5.9)         | 7 (12.5)         | 6 (9.2)        | 1 (4.8)         | 0.802                  |
| Sacubitril/Valsartan                      | 5 (3.1%)          | 0 (0.0%)         | 1.000                  | 1 (5.9)         | 1 (1.8)          | 2 (3.1)        | 1 (4.8)         | 0.625                  |
| Statin                                    | 76 (47.8%)        | 15 (55.6%)       | 0.534                  | 11 (64.7)       | 32 (57.1)        | 25 (38.5)      | 8 (38.1)        | 0.074                  |
| Mineralocorticoid receptor antagonist     | 2 (1.3%)          | 0 (0.0%)         | 1.000                  | 0 (0.0)         | 0 (0.0)          | 2 (3.1)        | 0 (0.0)         | 0.710                  |
| Beta Blocker                              | 33 (20.8%)        | 3 (11.1%)        | 0.301                  | 4 (23.5)        | 9 (16.1)         | 12 (18.5)      | 8 (38.1)        | 0.190                  |
| <b>Thiazide</b>                           | 14 (8.8%)         | 2 (7.4%)         | 1.000                  | <b>2 (11.8)</b> | <b>10 (17.9)</b> | <b>1 (1.5)</b> | <b>1 (4.8)</b>  | <b>0.008</b>           |
| Warfarin                                  | 1 (0.6%)          | 0 (0.0%)         | 1.000                  | 0 (0.0)         | 1 (1.8)          | 0 (0.0)        | 0 (0.0)         | 0.591                  |
| Novel oral anticoagulant therapy          | 12 (7.5%)         | 3 (11.1%)        | 0.461                  | 1 (5.9)         | 4 (7.1)          | 5 (7.7)        | 2 (9.5)         | 0.968                  |
| Inhaled Steroid                           | 24 (15.1%)        | 2 (7.4%)         | 0.379                  | 2 (11.8)        | 8 (14.3)         | 9 (13.8)       | 5 (23.8)        | 0.691                  |
| Inhaled Bronchodilator                    | 31 (19.5%)        | 3 (11.1%)        | 0.422                  | 2 (11.8)        | 11 (19.6)        | 11 (16.9)      | 7 (33.3)        | 0.349                  |
| Inhaled Anti-muscarinics                  | 15 (9.4%)         | 1 (3.7%)         | 0.475                  | 0 (0.0)         | 5 (8.9)          | 6 (9.2)        | 4 (19.0)        | 0.285                  |
| Sodium-glucose co-transporter-2 inhibitor | 17 (10.7%)        | 1 (3.7%)         | 0.479                  | 0 (0.0)         | 8 (14.3)         | 7 (10.8)       | 2 (9.5)         | 0.456                  |
| Glucagon-like peptide-1 agonist           | 4 (2.5%)          | 1 (3.7%)         | 0.548                  | 1 (5.9)         | 1 (1.8)          | 1 (1.5)        | 1 (4.8)         | 0.388                  |
| Insulin                                   | 8 (5.0%)          | 0 (0.0%)         | 0.605                  | 1 (5.9)         | 5 (8.9)          | 1 (1.5)        | 1 (4.8)         | 0.222                  |
| Other anti-diabetic                       | 24 (15.1%)        | 1 (3.7%)         | 0.135                  | 2 (11.8)        | 12 (21.4)        | 7 (10.8)       | 3 (14.3)        | 0.436                  |
| Loop diuretic                             | 5 (3.1%)          | 1 (3.7%)         | 1.000                  | 1 (5.9)         | 1 (1.8)          | 1 (1.5)        | 2 (9.5)         | 0.180                  |

|                |            |           |       |          |         |           |          |       |
|----------------|------------|-----------|-------|----------|---------|-----------|----------|-------|
| Oral Steroid   | 1 (0.6%)   | 1 (3.7%)  | 0.270 | 0 (0.0)  | 0 (0.0) | 0 (0.0)   | 1 (4.8)  | 0.239 |
| Antidepressant | 28 (17.6%) | 5 (18.5%) | 1.000 | 2 (11.8) | 5 (8.9) | 15 (23.1) | 6 (28.6) | 0.087 |

827  
828  
829

Table S10: n (%) of participants who were taking the medication at follow-up. \*Two controls developed COVID-19 after the imaging visit, hence they were excluded from this group. P-values are from Fisher's Exact tests. All p-values are two-sided. No adjustments were made for multiple comparisons. (a): COVID-19 patients with primary outcome vs. controls. (b): Comparing subgroups defined by likelihood of myocarditis.
